# Supplementary material for: Rhopalocnemis phalloides has one of the most reduced and mutated plastid genomes known
Source: PubMed Central journal article supplement (PMC6745192; doi:10.7717/peerj.7500), 2019-09-12
Supplement: peerj-07-7500-s001.pdf [file peerj-07-7500-s001.pdf]

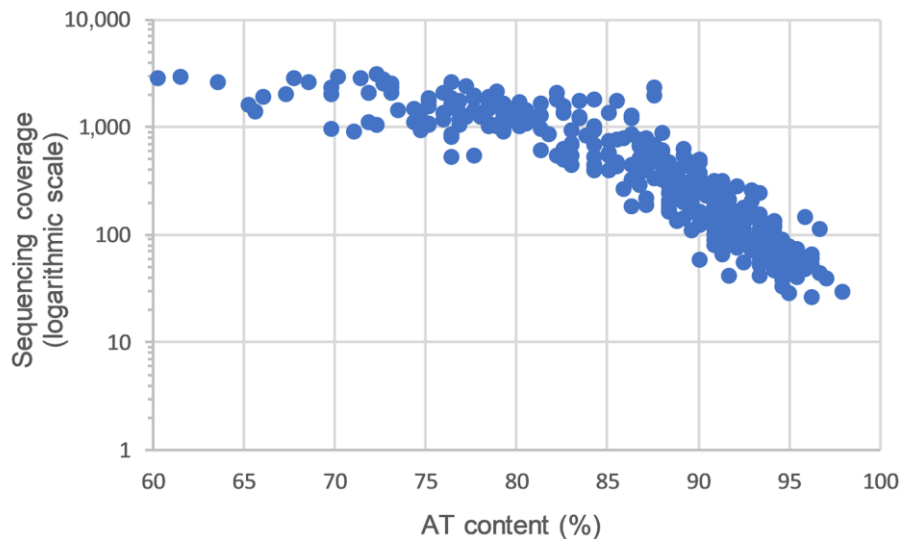

**Figure S1. Dependence of the sequencing coverage on the AT content in the plastid genome of *Rhopalocnemis phalloides*.** The sequencing coverage is provided on a logarithmic scale. The window size for the AT content calculation was 241 bp (the average insert size). The step for window sampling was 50 bp.

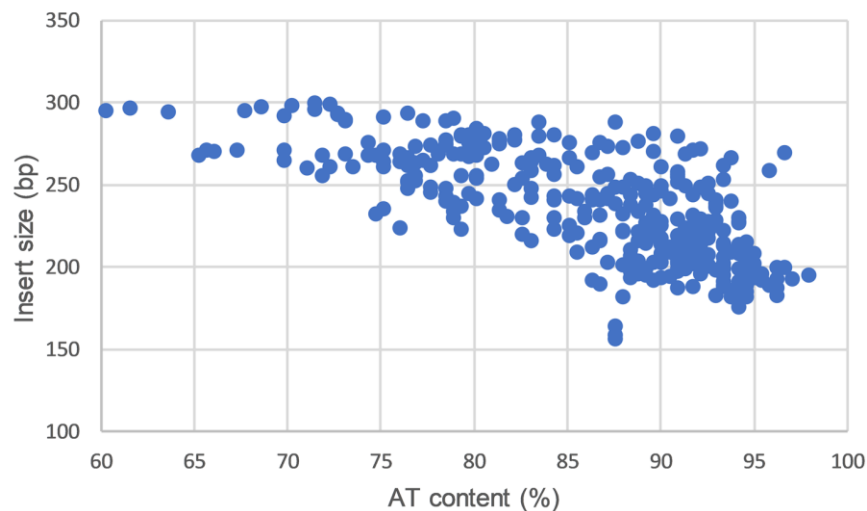

**Figure S2. Dependence of the insert size on the AT content in the plastid genome of *Rhopalocnemis phalloides*.** The window size for the AT content calculation was 241 bp (the average insert size over the whole genome). The step for window sampling was 50 bp.

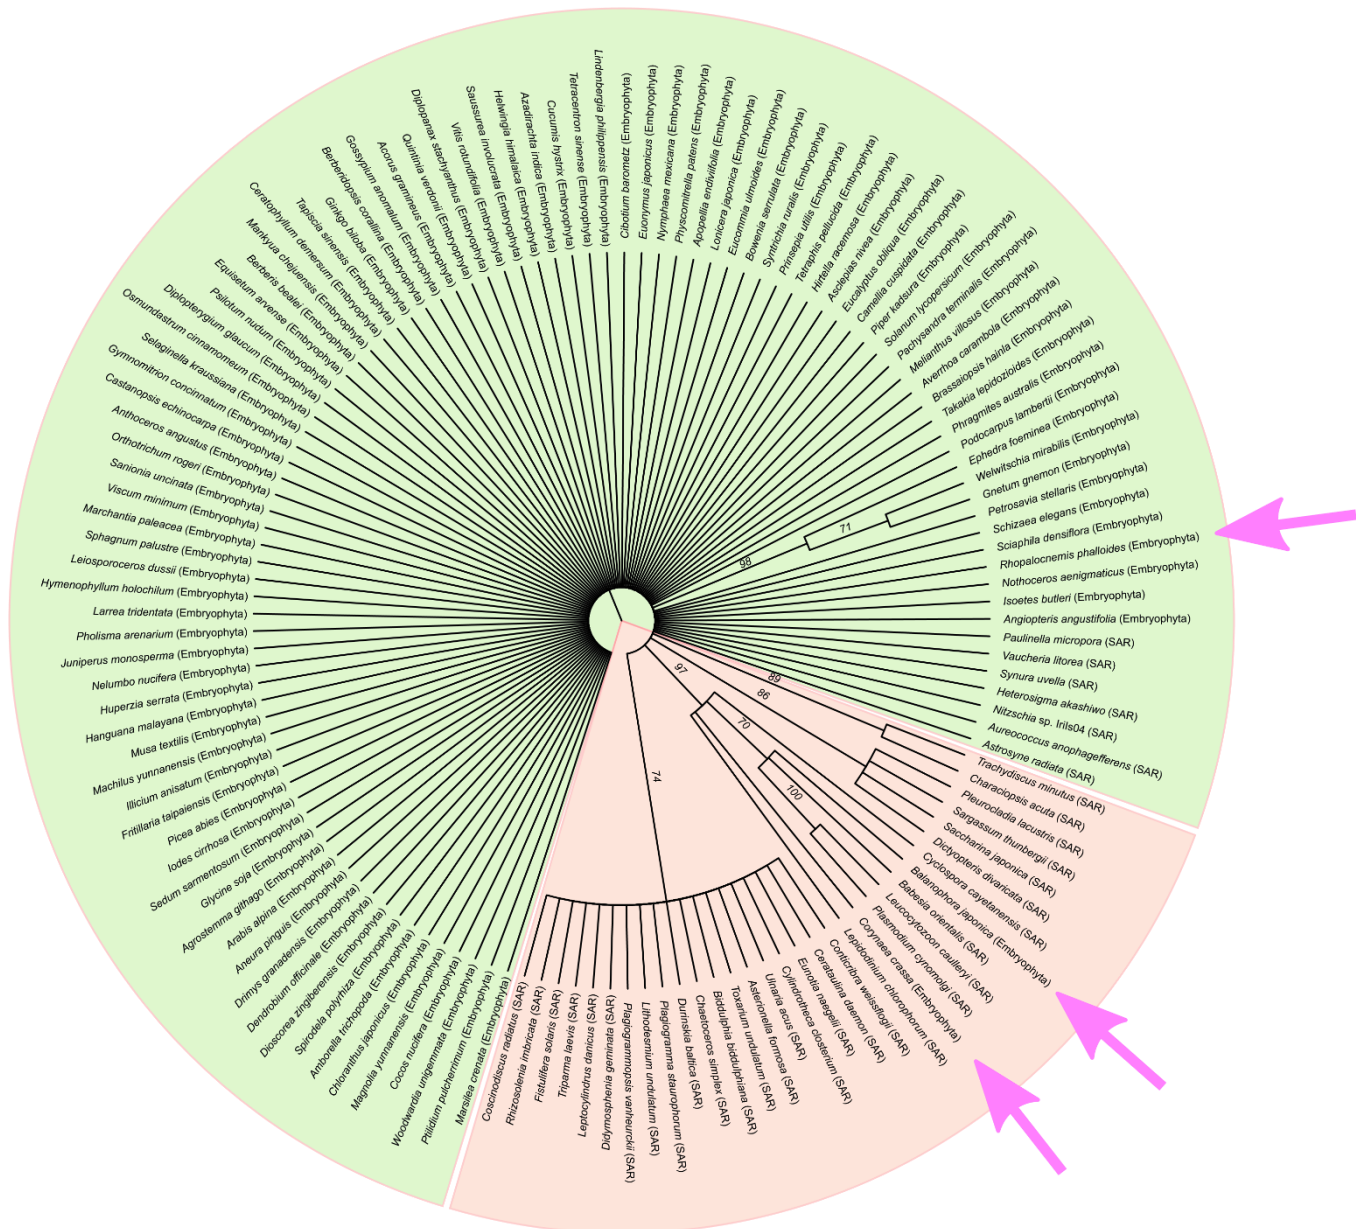

**Figure S3. The radial cladogram of *rrn16* from Embryophyta and SAR, after the removal of alignment columns where *Rhopalocnemis phalloides* had adenines or thymines.** Branches with bootstrap support below 70 are collapsed. The placement of the three Balanophoraceae is indicated by pink arrows. *R. phalloides* is situated in a poorly resolved group with all Embryophyta (except the two other Balanophoraceae) and several representatives of SAR. This group is coloured green, while other groups containing only SAR, *Corynaea crassa*, and *Balanophora japonica* are coloured orange.

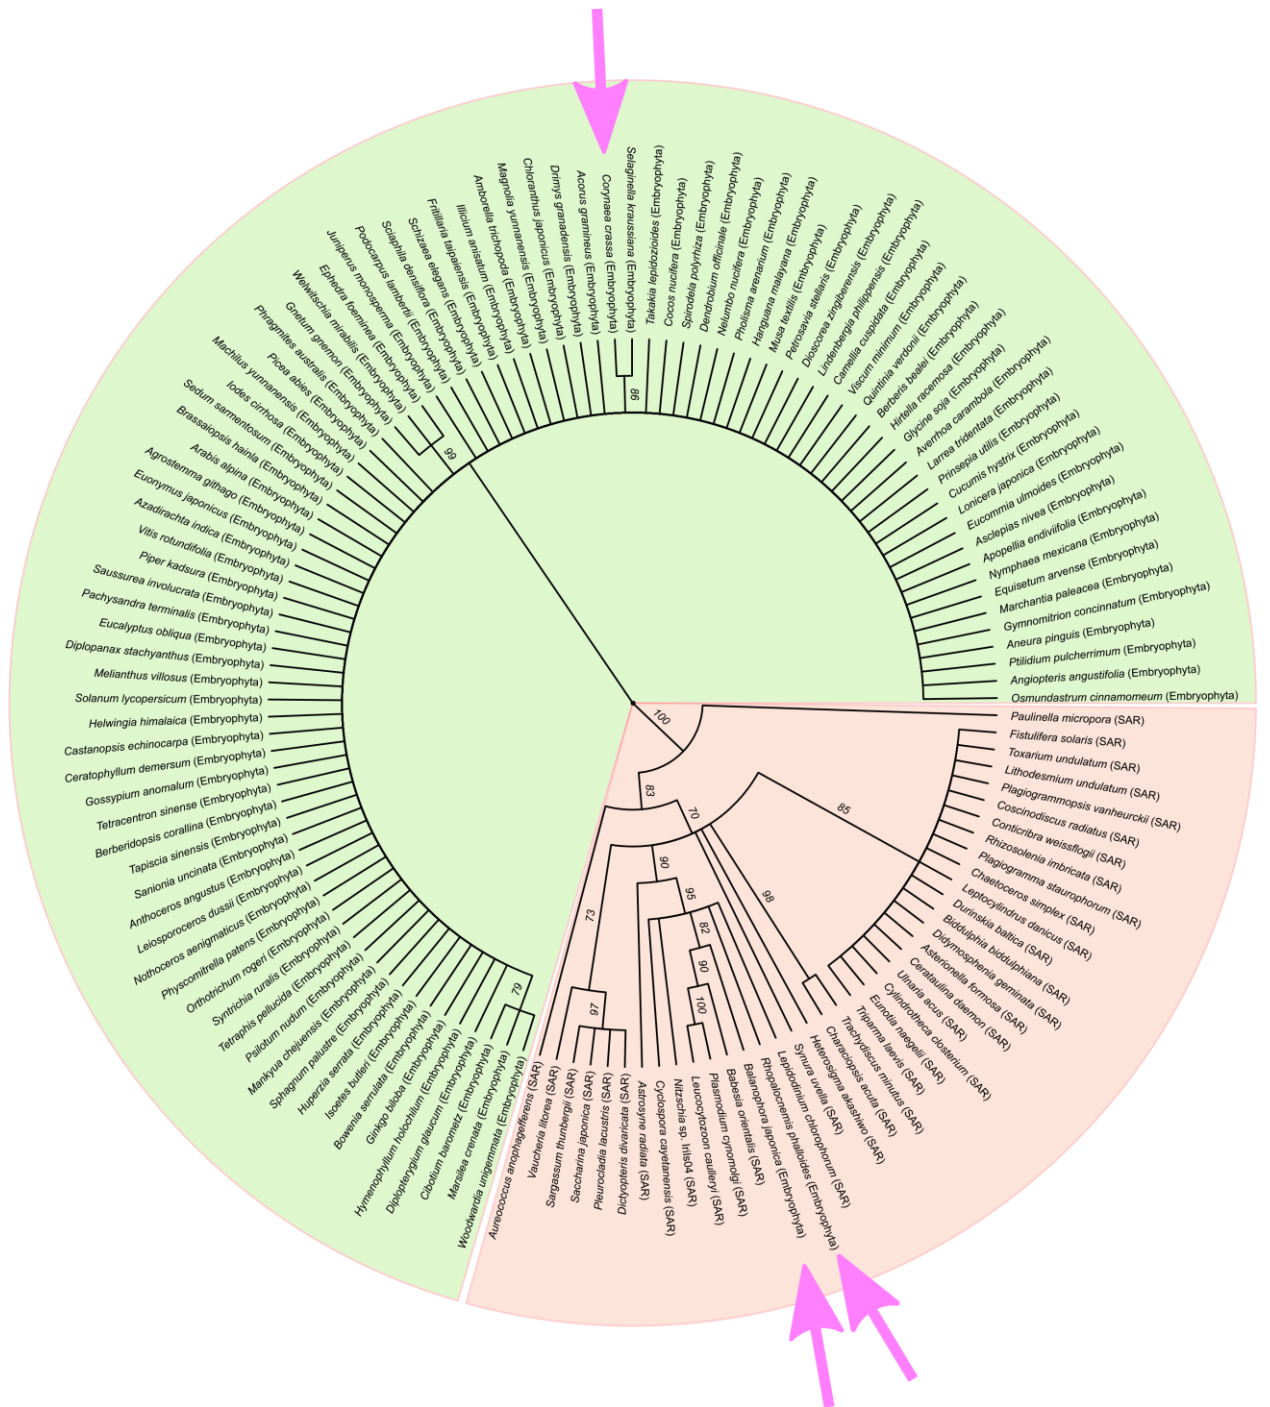

**Figure S4. The radial cladogram of *rrn16* from Embryophyta and SAR, after the removal of alignment columns where *Corynaea crassa* had adenines or thymines.** Branches with bootstrap support below 70 are collapsed. The placement of the three Balanophoraceae is indicated by pink arrows. *C. crassa* is situated in a poorly resolved group with all Embryophyta except the two other Balanophoraceae. This group is coloured green, while the group with SAR, *Rhopalocnemis phalloides*, and *Balanophora japonica* is coloured orange.

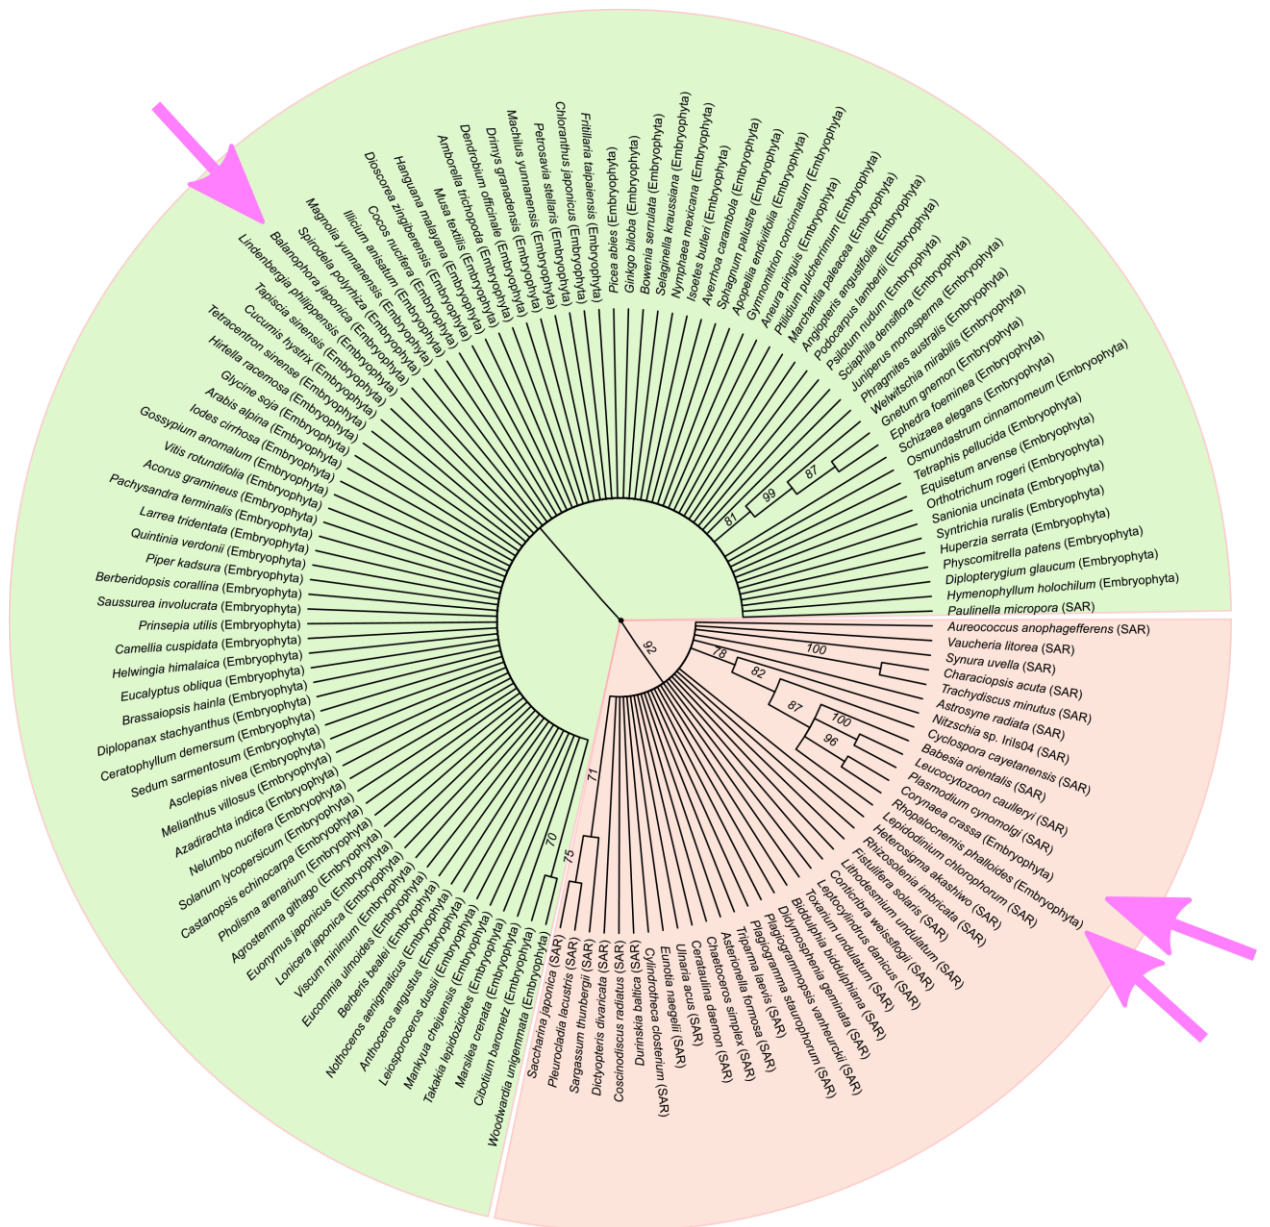

**Figure S5. The radial cladogram of *rrn16* from Embryophyta and SAR, after the removal of alignment columns where *Balanophora japonica* had adenines or thymines.** Branches with bootstrap support below 70 are collapsed. The placement of the three Balanophoraceae is indicated by pink arrows. *B. japonica* is situated in a poorly resolved group with all Embryophyta (except the two other Balanophoraceae) and *Paulinella micropora* (a representative of SAR). This group is coloured green, while the group with other representatives of SAR, *Rhopalocnemis phalloides*, and *Corynaea crassa* is coloured orange.





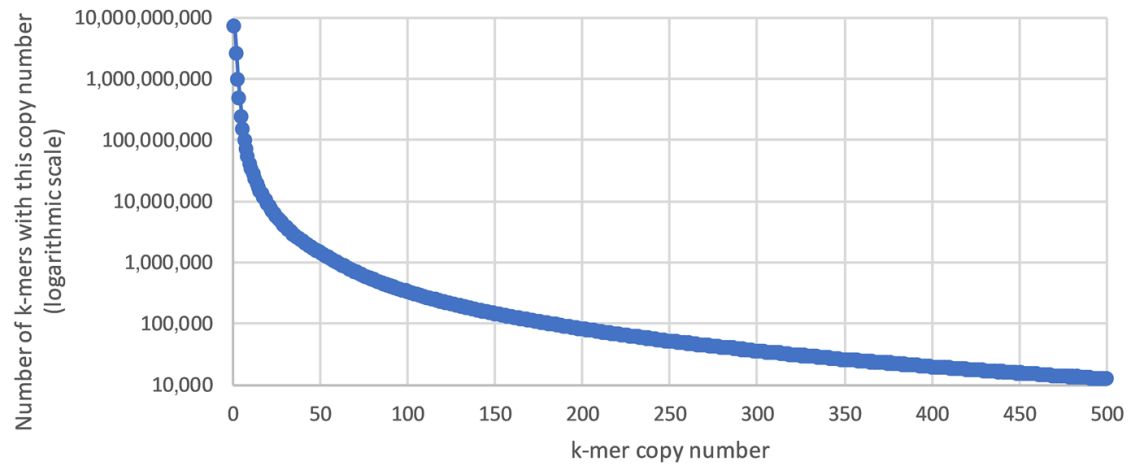

**Figure S7. K-mer frequency spectrum of DNA-seq reads.**
