# Supplementary material for: Rhopalocnemis phalloides has one of the most reduced and mutated plastid genomes known
Source: PeerJ. 2019 Sep 12;7:e7500. doi: 10.7717/peerj.7500 (PMC6745192; doi:10.7717/peerj.7500)
Supplement: Supplemental Information 2 [file peerj-07-7500-s002.xlsx]

## Sheet: 1
Table S1. A comparison of gene lengths and gene AT contents of Rhopalocnemis phalloides, Balanophora reflexa and mixotrophic Santalales.
In each string, smaller gene lengths and higher AT contents are coloured red. Larger gene lengths and smaller AT contents are coloured blue. Names of completely heterotrophic species are coloured orange, and names of mixotrophic species are coloured green.
	Gene length (bp)							Gene AT content (%)
Gene	Rhopalocnemis phalloides	Balanophora reflexa	Champereia manillana	Osyris alba	Schoepfia jasminodora	Viscum album		Rhopalocnemis phalloides	Balanophora reflexa	Champereia manillana	Osyris alba	Schoepfia jasminodora	Viscum album
rrn16	1510	1573	1491	1491	1491	1498		77.2	79	43.4	43.3	43.5	43.3
rrn23	2782	3052	2810	2808	2810	2812		77.7	81.4	44.8	44.8	45	44.9
accD	915	951	1545	1521	1485	1494		79.6	83.8	65.6	64.2	65.2	65.8
clpP	591	606	591	591	591	591		74.3	80.5	58.9	58.9	59.4	58.9
ycf1	3132	2691	5478	5664	5490	5469		91	94.8	71.8	70.3	69.6	74.9
ycf2	2475	771	6834	6879	6777	6780		92.6	97.8	62.4	62.2	63	61.8
rps3	639	624	657	657	657	663		89.8	95	66.2	65.9	66.1	66.2
rps7	438	408	468	468	468	468		89.3	95.1	60.3	60.3	59.8	59.6
rps12	360	372	372	369	372	372		77.2	80.4	56.2	56.4	58.6	58.1
rps14	258	204	303	303	303	300		88.4	93.1	59.7	58.4	57.8	58
rps18	177	165	306	306	357	294		88.7	95.8	66.7	65.4	65.8	69
rps19	258	219	279	225	279	282		86.4	92.7	64.5	62.7	65.2	65.6
rpl2	528	768	825	669	825	825		88.3	86.1	55.9	54.4	57	55.8
rpl16	426	absent	399	408	408	444		82.9	absent	56.6	57.1	58.1	59.7
rpl36	126	absent	114	114	114	111		88.9	absent	63.2	64	64.9	64

## Sheet: 2
Table S2. Locally collinear blocks (LCBs) between the plastid genomes of Rhopalocnemis phalloides and two species of comparison.
Genes that are present in only one species of comparison are coloured grey. LCBs are enumerated and have different colours. The arrows near the genes' names represent their direction on the chromosome.
LCBs	R. phalloides	Balanophora	LCBs			LCBs	R. phalloides	A. thaliana	LCBs
1	rps14↓	↓rps14	1			1	rps14↓	↑trnH-GUG
2	ycf2↓	↑rps4				2	ycf2↓	↑psbA
3	ycf1↑	↓accD	7			3	ycf1↑	↑trnK-UUU
	rrn23↑	↑rps18	6				rrn23↑	↑matK
	rrn16↑	↑rps12 (5' end)	5				rrn16↑	↑rps16
	rps12 (3' end)↓	↑clpP					rps12 (3' end)↓	↑trnQ-UUG
	rps7↓	↑rps11					rps7↓	↓psbK
	rpl36↑	↑rps3	4			4	rpl36↑	↓psbI
	rpl16↑	↑rps19					rpl16↑	↑trnS-GCU
4	rps3↑	↑rpl2					rps3↑	↓trnG-UCC
	rps19↑	↓ycf2	2				rps19↑	↓trnR-UCU
	rpl2↑	↑rps7	3				rpl2↑	↑atpA
5	clpP↓	↑rps12 (3' end)				1	clpP↓	↑atpF
	rps12 (5' end)↓	↓rrn16					rps12 (5' end)↓	↑atpH
6	rps18↑	↓rrn23					rps18↑	↑atpI
7	accD↑	↓rrn4.5					accD↑	↑rps2
		↓ycf1						↑rpoC2
		↓rpl14						↑rpoC1
		↑rps2						↑rpoB
		↑trnE						↓trnC-GCA
								↓petN
								↑psbM
								↑trnD-GUC
								↑trnY-GUA
								↑trnE-UUC
								↓trnT-GGU
								↓psbD
								↓psbC
								↑trnS-UGA
								↓psbZ
								↓trnG-GCC
								↑trnfM-CAU
								↑rps14	1
								↑psaB
								↑psaA
								↑ycf3
								↓trnS-GGA
								↑rps4
								↑trnT-UGU
								↓trnL-UAA
								↓trnF-GAA
								↑ndhJ
								↑ndhK
								↑ndhC
								↑trnV-UAC
								↓trnM-CAU
								↑atpE
								↑atpB
								↓rbcL
								↓accD
								↓psaI
								↓ycf4
								↓cemA
								↓petA
								↑psbJ
								↑psbL
								↑psbF
								↑psbE
								↓petL
								↓petG
								↑trnW-CCA
								↑trnP-UGG
								↓psaJ
								↓rpl33
								↓rps18
								↑rpl20
								↑rps12 (5' end)
								↑clpP
								↓psbB
								↓psbT
								↑psbN
								↓psbH
								↓petB
								↓petD
								↑rpoA
								↑rps11
								↑rpl36	4
								↑rps8
								↑rpl14
								↑rpl16
								↑rps3
								↑rpl22
								↑rps19
								↑rpl2
								↑rpl23
								↑trnI-CAU
								↓ycf2	2
								↑trnL-CAA
								↑ndhB
								↑rps7	3
								↑rps12 (3' end)
								↓trnV-GAC
								↓rrn16
								↓trnI-GAU
								↓trnA-UGC
								↓rrn23
								↓rrn4.5
								↓rrn5
								↓trnR-ACG
								↑trnN-GUU
								↓ycf1
								↑ndhF
								↓rpl32
								↓trnL-UAG
								↓ccsA
								↑ndhD
								↑psaC
								↑ndhE
								↑ndhG
								↑ndhI
								↑ndhA
								↑ndhH
								↑rps15

## Sheet: 3
Table S3. Genome lengths and AT content among the plastid genomes of Embryophyta.
Names of completely heterotrophic species are coloured orange, and names of mixotrophic or completely autotrophic are coloured green.
Species	Genome length (bp)	AT content (%)	GenBank accession
Pilostyles aethiopica	11348	75.7667	NC_029235
Sciaphila thaidanica	12780	69.5	MG757197
Pilostyles hamiltonii	15167	77.3324	NC_029236
Balanophora laxiflora	15505	87.8	KX784265
Balanophora reflexa	15507	88.4	KX784266
Thismia tentaculata	16031	72.9	KX171420
Rhopalocnemis phalloides	18622	86.8	MK036331
Epipogium roseum	19047	69.381	NC_026448
Cytinus hypocistis	19400	70.1134	NC_031150
Sciaphila densiflora	21485	60.0791	NC_027659
Hydnora visseri	27233	76.5872	NC_029358
Epipogium aphyllum	30650	67.1615	NC_026449
Monotropsis odorata	32752	68.7958	NC_035583
Gastrodia elata	35304	73.2297	NC_037409
Monotropa hypopitys	35336	65.6866	NC_029704
Hemitomes congestum	35569	66.2178	NC_035581
Pityopus californicus	35926	65.6266	NC_035584
Allotropa virgata	35983	66.9149	NC_035580
Burmannia oblonga	39386	66.7775	NC_036664
Monotropa uniflora	43351	71.5347	NC_035582
Conopholis americana	45673	66.0631	NC_023131
Rhizanthella gardneri	59190	65.7898	NC_014874
Phelipanche ramosa	62304	67.9443	NC_023465
Phelipanche purpurea	62891	68.9161	NC_023132
Orobanche gracilis	65533	65.4449	NC_023464
Epifagus virginiana	70028	64.0015	NC_001568
Boulardia latisquama	80361	64.2451	NC_025641
Orobanche austrohispanica	81994	64.9121	NC_031441
Orobanche densiflora	83024	64.4621	NC_031442
Neottia acuminata	83190	63.4259	NC_030709
Cuscuta obtusiflora	85286	62.165	NC_009949
Burmannia championii	85868	64.3756	NC_036663
Cuscuta gronovii	86744	62.2833	NC_009765
Orobanche crenata	87529	64.8139	NC_024845
Orobanche pancicii	88525	64.7568	NC_031443
Orobanche rapum-genistae	91517	64.505	NC_031444
Neottia nidus-avis	92060	65.5996	NC_016471
Cistanche phelypaea	94380	63.4393	NC_025642
Aphyllorchis montana	94559	62.893	NC_030703
Burmannia nepalensis	98706	65.3537	NC_036670
Cistanche deserticola	102657	63.2163	NC_021111
Petrosavia stellaris	103835	62.5309	NC_023356
Neottia camtschatea	106385	62.8303	NC_030707
Cathaya argyrophylla	107122	61.2171	NC_014589
Burmannia cryptopetala	107771	63.4558	NC_036662
Aneura mirabilis	108007	59.3767	NC_010359
Ephedra equisetina	109518	63.364	NC_011954
Ephedra foeminea	109584	63.3487	NC_029347
Neottia listeroides	110246	62.7678	NC_030713
Carnegiea gigantea	113064	63.3217	NC_027618
Gnetum ula	113249	61.5467	NC_028734
Aegilops cylindrica	113490	62.7104	NC_023096
Aegilops speltoides	113536	62.7457	NC_022135
Aegilops geniculata	113893	62.8081	NC_023097
Aegilops tauschii subsp. tauschii	114112	62.741	NC_022133
Cassytha filiformis	114622	63.0743	NC_036001
Secale cereale	114843	62.7883	NC_021761
Gnetum parvifolium	114914	61.8167	NC_011942
Gnetum montanum	115019	61.8437	NC_021438
Gnetum gnemon	115022	61.8464	NC_026301
Pinus strobus	115576	61.229	NC_026302
Triticum urartu	115773	62.6225	NC_021762
Triticum monococcum	116399	62.6294	NC_021760
Pinus monophylla	116479	61.2703	NC_011158
Pinus sibirica	116635	61.2766	NC_028552
Erodium rupestre	116810	61.1472	NC_030719
Erodium manescavi	116810	60.8783	NC_030720
Pinus nelsonii	116834	61.1123	NC_011159
Erodium carvifolium	116935	61.0425	NC_015083
Pinus krempfii	116989	61.0878	NC_011155
Pinus koraiensis	117190	61.2049	NC_004677
Pinus lambertiana	117239	61.2083	NC_011156
Pinus armandii	117265	61.2109	NC_029847
Dionaea muscipula	117589	61.6138	NC_035417
Pinus gerardiana	117618	61.1003	NC_011154
Keteleeria davidiana	117720	61.4492	NC_011930
Erodium reichardii	117753	60.8299	NC_030721
Pinus bungeana	117861	61.1678	NC_028421
Schoepfia jasminodora	118743	61.8731	NC_034228
Ptilidium pulcherrimum	119007	66.7742	NC_015402
Cedrus deodara	119299	60.8555	NC_014575
Pinus tabuliformis	119646	61.4738	NC_028531
Pinus thunbergii	119707	61.5043	NC_001631
Welwitschia mirabilis	119726	63.2745	NC_010654
Pinus massoniana	119739	61.4545	NC_021439
Pinus taiwanensis	119741	61.4911	NC_027415
Pinus sylvestris	119758	61.4999	NC_035069
Picea sitchensis	120176	60.7384	NC_011152
Lathyrus odoratus	120289	64.8405	NC_027150
Marchantia polymorpha subsp. ruderalis Kitashirakawa-2	120304	71.0309	NC_037507
Nicotiana sylvestris CCMP2878	120426	63.3742	HM222967
Pinus contorta	120438	61.1095	NC_011153
Pinus greggii	120501	61.5505	NC_035947
Apopellia endiviifolia	120546	64.1058	NC_019628
Pinus oocarpa	120596	61.5286	NC_035949
Aneura pinguis	120698	59.9795	NC_035617
Pinus jaliscana	120715	61.5392	NC_035948
Pisum fulvum	120837	65.1489	NC_036828
Orobanche californica	120840	63.3093	NC_025651
Tsuga chinensis	120859	61.935	NC_030630
Nothotsuga longibracteata	120900	60.6501	NC_037407
Lathyrus sativus	121020	64.8876	NC_014063
Marchantia polymorpha	121024	71.1917	NC_001319
Callitris rhomboidea	121117	65.2898	NC_034940
Abies sibirica	121224	61.7394	NC_035067
Lathyrus clymenum	121263	65.0512	NC_027148
Taxillus chinensis	121363	62.6674	NC_036306
Abies koreana	121373	61.7501	NC_026892
Erodium crassifolium	121393	60.9286	NC_025906
Cuscuta reflexa	121521	61.7794	NC_009766
Pinus taeda	121530	61.4992	NC_021440
Lathyrus tingitanus	122165	65.1259	NC_027151
Pisum sativum	122169	65.172	NC_014057
Pseudolarix amabilis	122234	61.5353	NC_030631
Lathyrus graminifolius	122438	65.0411	NC_027074
Vicia sativa	122467	64.8493	NC_027155
Larix decidua	122474	61.2236	NC_016058
Pseudotsuga sinensis var. wilsoniana	122513	61.2449	NC_016064
Larix sibirica	122560	61.2451	NC_036811
Taxillus sutchuenensis	122562	62.6687	NC_036307
Syntrichia ruralis	122630	71.6179	NC_012052
Lessertia frutescens	122700	65.8109	NC_036151
Carmichaelia australis	122805	65.7237	NC_035957
Physcomitrella patens	122890	71.4704	NC_005087
Nyholmiella obtusifolia	122895	71.5505	NC_026979
Physcomitrella patens	122905	71.4918	NC_037465
Lens culinaris	122967	65.5745	NC_027152
Lathyrus inconspicuus	123153	65.2554	NC_027149
Picea glauca	123266	61.2383	KT634228
Orthotrichum rogeri	123363	71.639	NC_026212
Tibetia liangshanensis	123372	65.3228	NC_036109
Astragalus mongholicus	123582	65.9093	NC_029828
Astragalus mongholicus var. nakaianus	123633	65.9274	NC_028171
Lathyrus littoralis	123734	65.185	NC_027076
Erodium trifolium	123865	60.7	NC_024635
Lathyrus davidii	123895	65.1124	NC_027073
Lathyrus ochroleucus	123911	65.0814	NC_027077
Medicago truncatula Variety Jema Long A-17	124033	66.0276	NC_003119
Picea abies	124084	61.2722	NC_021456
Picea crassifolia	124126	61.2821	NC_032366
Picea asperata	124145	61.2864	NC_032367
Picea jezoensis	124146	61.2424	NC_029374
Picea morrisonicola	124168	61.2098	NC_016069
Lathyrus japonicus	124242	65.098	NC_027075
Lathyrus palustris	124287	65.1476	NC_027078
Sanionia uncinata	124374	70.6836	NC_025668
Medicago falcata 1210	124430	66.0428	NC_032066
Medicago papillosa	125203	66.1693	NC_027154
Medicago hybrida	125208	66.1827	NC_027153
Cicer arietinum	125319	66.0937	NC_011163
Cuscuta exaltata	125373	61.8841	NC_009963
Lathyrus venosus	125459	65.1241	NC_027080
Trifolium grandiflorum	125628	65.1957	NC_024034
Trifolium boissieri	125740	65.1909	NC_025743
Trifolium strictum	125834	65.4608	NC_025745
Viscum crassulae	126064	63.6336	NC_027959
Trifolium glanduliferum	126149	65.5368	NC_025744
Tahina spectabilis	126251	63.5195	NC_029952
Lathyrus pubescens	126421	64.9939	NC_027079
Trifolium aureum	126970	65.3808	NC_024035
Hesperocyparis glabra	126993	65.3107	NC_026297
Juniperus cedrus	127126	65.0339	NC_028190
Callitropsis nootkatensis	127150	65.2662	NC_026295
Chamaecyparis formosensis	127211	65.007	NC_034943
Calocedrus formosana	127311	65.1672	NC_023121
Juniperus microsperma	127409	65.0409	NC_037430
Tetraphis pellucida	127489	70.6084	NC_024291
Callitropsis vietnamensis	127541	65.2747	NC_026298
Juniperus bermudiana	127659	65.1478	NC_024021
Taxus mairei	127665	65.2802	NC_020321
Juniperus monosperma	127744	65.1248	NC_024022
Juniperus virginiana	127770	65.1663	NC_024024
Juniperus scopulorum	127774	65.1815	NC_024023
Chamaecyparis hodginsii	127777	64.9765	NC_036996
Diplazium unilobum	127840	56.3744	NC_035853
Glycyrrhiza lepidota	127939	65.7579	NC_034229
Glycyrrhiza glabra	127943	65.7621	NC_024038
Cupressus chengiana	128151	65.2722	NC_034788
Cupressus gigantea	128244	65.2943	NC_028155
Cupressus jiangeensis	128286	65.3158	NC_036939
Juniperus communis	128334	65.1449	NC_035068
Taxus baccata	128653	65.4093	NC_035066
Viscum coloratum	128744	63.7195	NC_035414
Monsonia speciosa	128787	59.579	NC_014582
Viscum album	128921	63.611	NC_028012
Rytidosperma semiannulare	129095	61.6895	NC_036701
Cupressus sempervirens	129150	65.3999	NC_026296
Caragana korshinskii	129331	65.6416	NC_035229
Fragaria vesca subsp. bracteata	129788	63.8549	NC_018766
Fragaria mandshurica	129805	63.8589	NC_018767
Caragana microphylla	130029	65.7376	NC_032691
Wisteria sinensis	130561	65.6038	NC_029406
Erodium texanum	130812	60.46	NC_014569
Areca vestiaria	130917	63.4242	NC_029972
Wisteria floribunda	130960	65.6712	NC_027677
Viscum minimum	131016	63.8182	NC_027829
Caragana kozlowii	131274	65.505	NC_035228
Taiwania flousiana	131413	65.2774	NC_021441
Equisetum hyemale	131760	66.2606	NC_020146
Cryptomeria japonica	131810	64.6203	NC_010548
Metasequoia glyptostroboides	131887	64.7463	NC_027423
Taxodium distichum	131954	64.7385	NC_034941
Trifolium repens	132120	65.6971	NC_024036
Glyptostrobus pensilis	132239	64.6957	NC_031354
Tribolium hispidum	132449	61.709	NC_036705
Taiwania cryptomerioides	132588	65.3747	NC_016065
Oryza glaberrima	132629	61.0357	NC_024175
Downingia elegans	132649	59.1418	NC_035360
Rytidosperma pallidum	132765	61.706	NC_037166
Schismus arabicus	132811	61.836	NC_036703
Tenaxia guillarmodiae	132895	61.7548	NC_029897
Festuca ovina	133165	61.6273	NC_019649
Podocarpus totara	133259	62.8393	NC_020361
Retrophyllum piresii	133291	62.7432	NC_024827
Equisetum arvense	133309	66.6384	NC_014699
Phaenanthoecium koestlinii	133327	61.5794	NC_035533
Enneapogon oblongus	133433	61.6647	NC_036682
Nageia nagi	133722	62.7354	NC_023120
Fargesia denudata	133730	60.3148	NC_034747
Podocarpus lambertii	133734	62.8853	NC_023805
Bouteloua gracilis	133742	61.7532	NC_029892
Dacrycarpus imbricatus	133811	62.7684	NC_034942
Bouteloua curtipendula	133865	61.7719	NC_029414
Oropetium aristatum	133880	61.523	NC_036697
Cortaderia selloana	133885	61.4714	NC_036681
Sequoia sempervirens	133929	64.6342	NC_030372
Hakonechloa macra	133960	61.3482	NC_025235
Leersia japonica	134074	61.0849	NC_034766
Danthonia californica	134191	61.5541	NC_025232
Oryzopsis asperifolia	134281	61.2261	NC_027479
Trichoneura grandiglumis	134286	61.7689	NC_036707
Cynodon dactylon	134297	61.6246	NC_034680
Cephalotaxus oliveri	134337	64.7491	NC_021110
Catapodium rigidum	134338	61.7792	NC_036711
Drosera erythrorhiza	134393	62.2391	NC_035241
Porterella carnosula	134401	59.0516	NC_033376
Monsonia marlothii	134416	60.6966	NC_029830
Eragrostis tef	134435	61.6863	NC_029413
Nematopoa longipes	134459	61.7341	NC_035532
Oryza sativa f. spontanea SL10	134494	60.9916	NC_005973
Oryza sativa Indica Group	134496	61.0011	NC_008155
Leptochloa virgata	134500	61.5688	NC_036692
Oryza sativa	134502	61.0021	NC_031333
Leptochloa pluriflora	134507	61.5745	NC_037169
Panicum capillare	134520	61.4912	NC_030493
Oryza sativa Japonica Group	134525	61.0139	NC_001320
Oryza rufipogon	134544	60.9971	NC_017835
Triticum aestivum	134545	61.6857	NC_002762
Oryza sativa Indica Group	134546	60.9992	CP018170
Oryza meridionalis	134558	60.9915	NC_016927
Chloris virgata	134561	61.714	NC_032034
Centropodia glauca	134565	61.5754	NC_029411
Oryza longistaminata	134567	61.0105	NC_027462
Oryza glumipatula	134583	61.0114	NC_027461
Oryza punctata	134604	61.0257	NC_027676
Oryza brachyantha	134604	61.019	NC_030596
Oryza barthii	134674	61.0103	NC_027460
Melica mutica	134710	61.5025	NC_027477
Limnopoa meeboldii	134724	61.6742	NC_035531
Dactylis glomerata	134737	61.5696	NC_027473
Eriachne stipacea	134746	61.3985	NC_025234
Oryza coarctata	134750	61.0033	NC_036934
Melica subulata	134765	61.4982	NC_027478
Oryza rhizomatis	134796	60.9899	NC_034758
Cynosurus cristatus	134799	61.7423	NC_036713
Oryza eichingeri	134821	60.9979	NC_034759
Hilaria cenchroides	134824	61.6752	NC_029415
Lamarckia aurea	134854	61.5555	NC_037168
Eriachne armittii	134864	61.4137	NC_034791
Triodia stipoides	134874	61.573	NC_037157
Melanocenchris abyssinica	134878	61.7158	NC_036694
Dactyloctenium aegyptium	134889	61.6003	NC_036714
Vaseyochloa multinervosa	134891	61.5393	NC_036710
Oryza officinalis	134911	61.0017	NC_027463
Triodia wiseana	134962	61.6285	NC_037161
Oxychloris scariosa	134963	61.6339	NC_037158
Helictochloa hookeri	134975	61.6833	NC_027469
Pheidochloa gracilis	134979	61.4221	NC_035534
Heteropogon contortus	134982	61.5778	NC_035027
Connorochloa tenuis	134985	61.6654	NC_037165
Eragrostis minor	135023	61.7598	NC_029412
Coelachne africana	135041	61.7309	NC_035732
Eustachys glauca	135053	61.7002	NC_036685
Oryza minuta	135094	61.0353	NC_030298
Sporobolus heterolepis	135097	61.6424	NC_029417
Eriachne mucronata	135115	61.3944	NC_035529
Ehrharta bulbosa	135137	61.2845	NC_036715
Oryza grandiglumis	135150	61.0063	NC_034761
Eleusine indica	135151	61.8079	NC_030486
Lolium multiflorum	135175	61.7451	NC_019651
Oryza alta	135175	61.0039	NC_034760
Oryza latifolia	135190	61.0067	NC_034762
Brachypodium distachyon	135199	61.4302	NC_011032
Poa trivialis	135208	61.7086	NC_036975
Oryza australiensis	135224	61.0513	NC_024608
Dichaetaria wightii	135248	61.2992	NC_035525
Festuca altissima	135272	61.5515	NC_019648
Lolium perenne	135282	61.7525	NC_009950
Festuca pratensis	135291	61.7321	NC_019650
Hilaria rigida	135318	61.6829	NC_029896
Uniola paniculata	135322	61.6892	NC_036709
Guadua weberbaueri	135324	61.2456	NC_026991
Guadua angustifolia	135331	61.2676	NC_029749
Cunninghamia lanceolata	135334	64.9984	NC_021437
Puccinellia nuttalliana	135353	61.6676	NC_027485
Deschampsia antarctica	135362	61.6842	NC_023533
Lithachne pauciflora	135362	61.3806	NC_026970
Neyraudia reynaudiana	135367	61.6413	NC_024262
Chloris barbata	135372	61.7425	NC_029893
Guadua chacoensis	135403	61.2416	NC_029232
Poa palustris	135446	61.7013	NC_027484
Distichlis bajaensis	135452	61.8263	NC_029894
Zingeria biebersteiniana	135493	61.6977	NC_037170
Setaria italica	135516	61.1345	NC_022850
Nardus stricta	135523	61.5748	NC_036695
Trisetum cernuum	135539	61.5019	NC_027487
Anthoxanthum odoratum	135551	61.7554	NC_027467
Phleum alpinum	135568	61.6082	NC_027482
Chloris truncata	135584	61.7418	NC_032033
Sporobolus maritimus	135592	61.5435	NC_027650
Sporobolus michauxianus	135617	61.5572	NC_029416
Amphipogon turbinatus	135638	61.3279	NC_035521
Oryza longiglumis	135641	61.07	NC_034763
Cephalotaxus sinensis	135646	64.8954	NC_037245
Poa annua	135653	61.7848	NC_036973
Holcus lanatus	135668	61.593	NC_036689
Chionochloa macra	135720	61.5959	NC_025230
Oryza ridleyi	135731	61.0826	NC_034764
Astrebla pectinata	135737	61.6715	NC_029891
Raddia brasiliensis	135739	61.1512	NC_026966
Phalaris arundinacea	135753	61.4734	NC_027481
Isachne distichophylla	135782	61.5398	NC_025236
Halopyrum mucronatum	135815	61.5573	NC_036688
Triticum turgidum	135835	61.6734	NC_024814
Poa nemoralis	135845	61.6924	NC_036974
Zoysia macrantha	135845	61.6239	NC_029418
Isachne albens	135867	61.6758	NC_035530
Avena sterilis	135887	61.4945	NC_031650
Avena sativa	135890	61.4939	NC_027468
Triticum macha	135899	61.684	NC_025955
Paspalum dilatatum	135950	61.3292	NC_030614
Amphipogon caricinus	135994	61.3637	NC_035520
Festuca arundinacea	136048	61.6077	NC_011713
Alloeochaete oreogena	136079	61.3599	NC_035518
Torreyochloa pallida	136104	61.4831	NC_027486
Oryza meyeriana	136133	61.0557	NC_034765
Prosphytochloa prehensilis	136145	61.0614	NC_037159
Triticum timopheevii	136157	61.7096	NC_024764
Alopecurus arundinaceus	136189	61.6929	NC_037163
Larrea tridentata	136194	64.9074	NC_028023
Cephalotaxus wilsoniana	136196	64.9211	NC_016063
Zoysia japonica	136200	61.6307	NC_036827
Olmeca reflexa	136213	61.2284	NC_026965
Aristida ternipes	136231	61.5278	NC_037164
Rhynchoryza subulata	136303	61.0001	NC_016718
Rhipidocladum pittieri	136314	61.1903	NC_036700
Brachypodium hybridum	136327	61.4478	NC_036836
Brachypodium stacei	136330	61.448	NC_036837
Elytrophorus spicatus	136346	61.553	NC_025233
Otatea acuminata	136351	61.2229	NC_026971
Zizania aquatica	136364	60.9838	NC_026967
Otatea glauca	136377	61.22	NC_028631
Anthoxanthum nitens	136395	61.5286	NC_027475
Elytrophorus globularis	136403	61.5492	NC_035527
Amentotaxus formosana	136430	64.1714	NC_024945
Zizania latifolia	136461	61.0042	NC_029401
Hordeum vulgare subsp. vulgare	136462	61.6809	NC_008590
Merxmuellera tsaratananensis	136522	61.4575	NC_036122
Leersia tisserantii	136551	61.1215	NC_016677
Chikusichloa aquatica	136563	60.9557	NC_027184
Agrostis stolonifera	136584	61.5482	NC_008591
Gastridium ventricosum	136606	61.4936	NC_036686
Amentotaxus argotaenia	136657	64.1489	NC_027581
Agrostis gigantea	136705	61.501	NC_037162
Ammophila breviligulata	136726	61.4448	NC_027465
Downingia cuspidata	136733	58.8724	NC_035359
Dregeochloa pumilla	136746	61.6018	NC_035526
Olyra latifolia	136785	61.1339	NC_024165
Drosera regia	136810	62.3704	NC_035415
Briza maxima	136823	61.668	NC_027471
Hordeum jubatum	136826	61.7587	NC_027476
Taeniatherum caput-medusae	136827	61.6852	NC_037160
Littledalea alaica	136840	61.4879	NC_037519
Chusquea spectabilis	136848	61.1869	NC_026959
Littledalea racemosa	136852	61.4912	NC_036350
Aegilops bicornis	136861	61.7064	NC_024831
Littledalea przevalskyi	136862	61.4904	NC_037497
Aegilops searsii	136863	61.7048	NC_024815
Aegilops sharonensis	136867	61.7059	NC_024816
Aegilops kotschyi	136868	61.7069	NC_024832
Aegilops longissima	136875	61.7074	NC_024830
Piptatherum songaricum	136908	61.1885	NC_036699
Bromus vulgaris	136934	61.6662	NC_027472
Ampelodesmos mauritanicus	136937	61.169	NC_027466
Torreya grandis	136949	64.5635	NC_034806
Lygeum spartum	137039	61.3453	NC_036693
Eragrostis walteri	137056	61.6901	NC_035528
Torreya fargesii	137075	64.5347	NC_029398
Arundo donax	137093	61.3707	NC_037077
Arundo plinii	137128	61.377	NC_034652
Stipa purpurea	137370	61.2077	NC_029390
Brachyelytrum aristosum	137399	61.3731	NC_027470
Diarrhena obovata	137421	61.1872	NC_027474
Oplismenus hirtellus	137424	61.4216	NC_030491
Styppeiochloa gynoglossa	137458	61.3467	NC_035535
Diandrolyra sp. Clark 1301	137469	61.1898	NC_026960
Phragmites australis	137561	61.3473	NC_022958
Molinia caerulea	137574	61.3532	NC_033980
Monachather paradoxus	137625	61.4351	NC_025237
Bothriochloa alta	137645	61.4487	NC_030621
Aristida rufescens	137659	61.4736	NC_036130
Piptochaetium avenaceum	137701	61.2261	NC_027483
Nassella hyalina	137710	61.1895	NC_036696
Stipa hymenoides	137742	61.1825	NC_027464
Stipa hohenackeriana	137753	61.2074	NC_037028
Stipa arabica	137757	61.21	NC_037024
Humbertochloa bambusiuscula	137797	61.0659	NC_036691
Stipa caucasica	137798	61.2026	NC_037027
Stipa orientalis	137822	61.2094	NC_037033
Stipa borysthenica	137825	61.2088	NC_037025
Stipa jagnobica	137827	61.2086	NC_037029
Stipa lessingiana	137829	61.2077	NC_037030
Stipa capillata	137830	61.2029	NC_037026
Stipa zalesskii	137836	61.2111	NC_037037
Stipa magnifica	137848	61.2123	NC_037031
Stipa x alaica	137850	61.2006	NC_037035
Stipa x brevicallosa	137850	61.1991	NC_037036
Stipa lipskyi	137854	61.1995	NC_028444
Stipa narynica	137854	61.1995	NC_037032
Phyllorachis sagittata	137864	61.0587	NC_036698
Stipa ovczinnikovii	137874	61.2146	NC_037034
Phaenosperma globosum	137897	61.1928	NC_027480
Crinipes abyssinicus	137909	61.3564	NC_035523
Chusquea circinata	137951	61.1246	NC_027490
Chasechloa madagascariensis	137987	61.3811	NC_033880
Chusquea liebmannii	138001	61.1612	NC_026969
Stipagrostis hirtigluma	138026	61.4906	NC_036112
Schizachyrium brevifolium	138027	61.4003	NC_035013
Crinipes longifolius	138030	61.3845	NC_035524
Sartidia dewinteri	138074	61.5858	NC_027147
Setaria viridis	138102	61.2844	NC_028075
Buergersiochloa bambusoides	138122	61.0221	NC_026968
Cenchrus purpureus	138199	61.4071	NC_036384
Alloteropsis semialata	138209	61.5119	NC_027824
Capillipedium venustum	138257	61.4898	NC_030622
Ophioglossum californicum	138270	57.8455	NC_020147
Dichanthium sericeum	138271	61.4937	NC_035018
Hickelia madagascariensis	138276	61.0909	NC_026962
Sciadopitys verticillata	138284	64.5794	NC_029734
Kerriochloa siamensis	138335	61.6973	NC_035009
Loudetiopsis kerstingii	138377	61.2862	NC_030612
Anomochloa marantoidea	138412	61.3401	NC_014062
Aristida purpurea	138423	61.4999	NC_025228
Sartidia perrieri	138471	61.6194	NC_027146
Distichlis spicata	138504	61.8033	NC_029895
Schizachyrium exile	138519	61.4486	NC_035029
Schizachyrium tenerum	138555	61.4861	NC_035043
Loudetia simplex	138600	61.1934	NC_036113
Sartidia isaloensis	138607	61.6123	NC_036117
Andropogon fastigiatus	138658	61.4368	NC_035010
Andropogon abyssinicus	138738	61.4705	NC_035030
Homolepis aturensis	138757	61.3353	NC_036125
Urochloa ruziziensis	138765	61.3685	NC_030068
Andropogon chinensis	138817	61.4334	NC_035012
Themeda arguens	138827	61.4434	NC_035019
Psilotum nudum	138829	63.9686	NC_003386
Themeda triandra	138865	61.4532	NC_035016
Homolepis isocalycia	138875	61.3084	NC_036690
Stenotaphrum secundatum	138907	61.3533	NC_036704
Tristachya leucothrix	138918	61.2628	NC_036708
Arundinaria gigantea	138935	61.0674	NC_020341
Urochloa decumbens	138945	61.4085	NC_030066
Urochloa brizantha	138946	61.4095	NC_030067
Panicum lycopodioides	138954	61.3944	NC_036121
Themeda quadrivalvis	138961	61.4683	NC_035492
Eremochloa ciliaris	138970	61.6867	NC_035028
Urochloa humidicola	138976	61.5049	NC_030069
Megathyrsus maximus	138994	61.4307	NC_030489
Eremochloa eriopoda	138995	61.6929	NC_035023
Eremochloa ophiuroides	139061	61.5974	NC_036716
Lecomtella madagascariensis	139073	61.3829	NC_024106
Andropogon distachyos	139098	61.4804	NC_035041
Tristachya humbertii	139098	61.3143	NC_036115
Oldeania ibityensis	139130	61.1536	NC_036818
Paspalidium geminatum	139142	61.4279	NC_030494
Hildaea pallens	139145	61.3418	NC_036124
Danthoniopsis dinteri	139169	61.3082	NC_030502
Hyparrhenia subplumosa	139174	61.4914	NC_030625
Hyparrhenia diplandra	139175	61.4636	NC_035037
Whiteochloa capillipes	139177	61.3866	NC_030618
Alloeochaete namuliensis	139190	61.4002	NC_035517
Pogonatherum paniceum	139205	61.584	NC_029881
Schizachyrium spicatum	139205	61.5409	NC_035039
Axonopus fissifolius	139250	61.3566	NC_030501
Paspalum glaziovii	139255	61.2797	NC_030496
Chaetium bromoides	139257	61.4684	NC_036712
Hyparrhenia rufa	139269	61.4975	NC_035011
Schizachyrium sanguineum	139272	61.5249	NC_035015
Schizachyrium scoparium	139274	61.4982	NC_035032
Bambusa arnhemica	139289	61.0759	NC_026958
Alloteropsis cimicina	139317	61.3988	NC_027952
Bambusa oldhamii	139350	61.0786	NC_012927
Greslania sp. McPherson 19217	139351	61.2712	NC_026961
Panicum sumatrense	139384	61.3758	NC_032378
Bambusa multiplex	139394	61.0894	NC_024668
Dendrocalamus latiflorus	139394	61.0801	NC_013088
Alloeochaete uluguruensis	139395	61.4147	NC_035519
Neololeba atra	139395	61.1177	NC_026964
Neohouzeaua sp. Clark & Attigala 1712	139458	61.0808	NC_026963
Centotheca lappacea	139464	61.3793	NC_025229
Ferrocalamus rimosivaginus	139467	61.1356	NC_015831
Bambusa emeiensis	139493	61.0905	NC_015830
Arundinaria tecta	139499	61.0843	NC_023935
Chimonobambusa tumidissinoda	139502	61.0894	NC_036814
Fargesia nitida	139535	61.1044	NC_024715
Arundinaria appalachiana	139547	61.092	NC_023934
Bergbambos tessellata	139564	61.1153	NC_036816
Tricholaena monachne	139570	61.5691	NC_036706
Alloteropsis paniculata	139586	61.4152	NC_032078
Themeda villosa	139589	61.507	NC_035021
Echinochloa ugandensis	139592	61.3631	NC_036127
Echinochloa frumentacea	139593	61.3634	NC_029827
Axonopus ramosus	139596	61.4137	NC_036129
Drepanostachyum falcatum	139596	61.1178	NC_037167
Oldeania alpina	139599	61.1057	NC_036813
Bambusa bambos	139606	61.0755	NC_026957
Fargesia yunnanensis	139609	61.1035	NC_024717
Panicum virgatum	139619	61.4028	NC_015990
Indocalamus sinicus	139619	61.1049	NC_036819
Garnotia tenella	139629	61.6104	NC_035051
Sarocalamus faberi	139629	61.1119	NC_024713
Yushania levigata	139633	61.103	NC_024725
Pseudosasa japonica	139641	61.1067	NC_028328
Iseilema macratherum	139643	61.5312	NC_030611
Oligostachyum shiuyingianum	139647	61.0847	NC_024722
Oldeania cf. madagascariensis PFM-2018	139649	61.1612	NC_036823
Indosasa sinica	139660	61.1012	NC_024721
Garnotia thailandica	139668	61.619	NC_035042
Indocalamus longiauritus	139668	61.0942	NC_015803
Phyllostachys edulis	139679	61.1166	NC_015817
Ampelocalamus calcareus	139689	61.1587	NC_024731
Pseudosasa cantorii	139689	61.1036	NC_036824
Arundinaria fargesii	139696	61.1199	NC_024712
Acidosasa purpurea	139697	61.103	NC_015820
Phyllostachys propinqua	139704	61.1242	NC_016699
Indosasa shibataeoides	139711	61.1018	NC_036820
Gelidocalamus tessellatus	139712	61.1143	NC_024719
Cymbopogon flexuosus	139715	61.5374	NC_035040
Echinochloa colona	139719	61.3617	NC_032383
Pleioblastus maculatus	139720	61.1001	NC_024723
Plagiantha tenella	139722	61.4656	NC_030497
Utricularia reniformis	139725	61.8486	NC_029719
Phyllostachys sulphurea	139731	61.111	NC_024669
Shibataea chiangshanensis	139737	61.1334	NC_036826
Zeugites pittieri	139738	61.3956	NC_030500
Themeda arundinacea	139742	61.5234	NC_035014
Oldeania itremoensis	139751	61.1738	NC_036821
Brachiaria fragrans	139753	61.2745	NC_033879
Schizachyrium imberbe	139759	61.5238	NC_035045
Fargesia spathacea	139767	61.1203	NC_024716
Ampelocalamus actinotrichus	139774	61.1272	NC_036815
Thamnocalamus spathiflorus	139778	61.1613	NC_024724
Germainia capitata	139817	61.5075	NC_035046
Chimonocalamus longiusculus	139821	61.1332	NC_024714
Panicum miliaceum	139826	61.3942	NC_029732
Phyllostachys nigra var. henonis	139839	61.0953	NC_015826
Echinochloa esculenta	139851	61.3675	NC_032379
Echinochloa crus-galli	139857	61.372	NC_028719
Arthraxon microphyllus	139858	61.7147	NC_035050
Ampelocalamus naibunensis	139860	61.1333	NC_030767
Oncorachis ramosa	139873	61.4665	NC_030490
Echinochloa stagnina	139886	61.3657	NC_036128
Eriochloa meyeriana	139890	61.5762	NC_030624
Echinochloa oryzicola STB03	139891	61.3678	NC_024643
Coleataenia prionitis	139897	61.3394	NC_025231
Steinchisma laxum	139902	61.4716	NC_030499
Sasa longiligulata	139928	61.1593	NC_036825
Indocalamus wilsonii	139962	61.2038	NC_024720
Chrysopogon zizanioides	139971	61.5456	NC_035034
Kuruna debilis	139971	61.207	NC_036822
Genlisea aurea	140010	61.5385	NC_037078
Chrysopogon gryllus	140034	61.5536	NC_035035
Sphagnum palustre	140040	63.1262	NC_030198
Oldeania humbertii	140047	61.2116	NC_036817
Panicum miliaceum	140048	61.4411	CM009689
Gaoligongshania megalothyrsa	140064	61.0885	NC_024718
Otachyrium versicolor	140081	61.4973	NC_030492
Thysanolaena latifolia	140097	61.2747	NC_025238
Sacciolepis indica	140118	61.5003	NC_036702
Heteropogon triticeus	140120	61.4987	NC_035025
Pariana campestris	140120	61.0884	NC_027491
Dichanthelium acuminatum	140122	61.3487	NC_030623
Eriochrysis laxa	140135	61.5728	NC_029883
Urochloa reptans	140177	61.4937	NC_030617
Eulalia aurea	140220	61.5269	NC_030503
Apluda mutica	140299	61.55	NC_036684
Genlisea filiformis	140308	61.3244	NC_037079
Rottboellia cochinchinensis	140336	61.5972	NC_030615
Puelia olyriformis	140344	61.0265	NC_023449
Parahyparrhenia siamensis	140355	61.6066	NC_035033
Pariana radiciflora	140361	61.0946	NC_026972
Chasechloa egregia	140371	61.4108	NC_031299
Arthraxon lanceolatus	140381	61.717	NC_035017
Zea mays	140384	61.5376	NC_001666
Eriochrysis cf. cayennensis 365-2	140426	61.5961	NC_029882
Lasiacis nigra	140431	61.3632	NC_036123
Genlisea repens	140432	61.4561	NC_037081
Gynerium sagittatum	140453	61.2369	NC_036687
Genlisea pygmaea	140466	61.4476	NC_037080
Pseudosorghum fasciculare	140474	61.6007	NC_035024
Pseudolasiacis leptolomoides	140480	61.3724	NC_036119
Arthraxon prionodes	140486	61.7271	NC_030613
Arthraxon hispidus	140507	61.7208	NC_035048
Streptostachys asperifolia	140576	61.4145	NC_036116
Zea diploperennis	140608	61.4211	NC_030377
Dimeria ornithopoda	140629	61.6061	NC_035020
Sorghum timorense	140629	61.4951	NC_023800
Eulalia siamensis	140642	61.493	NC_035031
Thyridolepis xerophila	140644	61.3485	NC_030616
Zea perennis	140647	61.5548	NC_030300
Genlisea tuberosa	140677	61.5388	NC_037082
Chrysopogon serrulatus	140700	61.6247	NC_029884
Alloteropsis angusta	140709	61.5668	NC_027951
Zea luxurians	140710	61.5635	NC_030301
Chrysopogon orientalis	140712	61.6323	NC_035047
Cenchrus americanus	140718	61.479	NC_024171
Entolasia imbricata	140721	61.4699	NC_036126
Eulalia contorta	140738	61.5783	NC_035026
Coix lacryma-jobi	140745	61.5397	NC_013273
Sorghum bicolor	140754	61.5087	NC_008602
Streptogyna americana	140761	60.8919	NC_036683
Hemisorghum mekongense	140765	61.5096	NC_035022
Mnesithea helferi	140801	61.6409	NC_035036
Arundinella deppeana	140804	61.6268	NC_030620
Paspalum fimbriatum	140804	61.2568	NC_030495
Amphicarpum muhlenbergianum	140810	61.3806	NC_030619
Imperata cylindrica	140831	61.5468	NC_030487
Polytoca digitata	140892	61.6082	NC_035044
Andropogon burmanicus	140898	61.6134	NC_035038
Saccharum hildebrandtii	140901	61.5482	NC_036118
Digitaria exilis	140908	61.5281	NC_024176
Panicum pygmaeum	140996	61.3571	NC_036120
Tripsacum dactyloides	141050	61.5831	NC_037087
Sorghastrum nutans	141061	61.6379	NC_030498
Eulaliopsis binata	141091	61.6326	NC_035049
Ischaemum afrum	141097	61.6377	NC_030488
Miscanthus junceus	141149	61.5775	NC_035751
Saccharum spontaneum	141168	61.5508	NC_034802
Saccharum officinarum	141176	61.5551	NC_035224
Saccharum hybrid cultivar	141181	61.5614	NC_029221
Saccharum hybrid cultivar SP80-3280	141182	61.5617	NC_005878
Saccharum officinarum	141182	61.5588	NC_006084
Chasmanthium laxum	141203	61.2678	NC_035522
Saccharum arundinaceum	141210	61.5509	NC_030777
Genlisea margaretae	141255	61.6573	NC_025652
Miscanthus transmorrisonensis	141266	61.6065	NC_035752
Miscanthus sacchariflorus	141332	61.6159	NC_028720
Miscanthus x giganteus	141345	61.601	NC_035753
Miscanthus floridulus	141356	61.6125	NC_035750
Miscanthus sinensis	141372	61.6105	NC_028721
Cressa cretica	141419	61.4224	NC_035516
Aldrovanda vesiculosa	141568	63.1301	NC_035416
Leptaspis banksii	141810	61.435	NC_033863
Pharus lappulaceus	141928	61.5714	NC_023245
Leptaspis zeylanica	141946	61.5164	NC_033864
Pharus latifolius	142077	61.625	NC_021372
Erodium gruinum	142208	56.3759	NC_025907
Trifolium meduseum	142595	65.5128	NC_024166
Illicium anisatum	142723	60.8304	NC_034703
Osmundastrum cinnamomeum	142812	59.7695	NC_024157
Oberonia japonica	142996	62.6318	NC_035832
Erycina pusilla	143164	63.349	NC_018114
Illicium verum	143187	60.8924	NC_034689
Illicium henryi	143240	60.8727	NC_034699
Genlisea violacea	143416	61.4464	NC_037083
Pedicularis hallaisanensis	143469	61.3477	NC_037433
Illicium floridanum	143571	60.9573	NC_034685
Selaginella moellendorffii	143780	48.9957	NC_013086
Zostera marina	143877	64.5433	NC_036014
Arracacia xanthorrhiza	143989	62.5221	NC_032364
Strobilanthes cusia	144133	61.7957	NC_037485
Trifolium subterraneum	144763	65.601	NC_011828
Eulophia zollingeri	145201	63.1304	NC_037212
Isoetes flaccida	145303	62.0565	NC_014675
Agathis dammara	145625	63.4637	NC_023119
Wollemia nobilis	145630	63.5096	NC_027235
Gastrochilus fuscopunctatus	146183	63.216	NC_035830
Mankyua chejuensis	146221	62.0287	NC_017006
Corallorhiza wisteriana	146437	62.9472	NC_025663
Oncidium hybrid cultivar	146484	62.6812	NC_014056
Neofinetia falcata	146497	63.3576	NC_036372
Neofinetia richardsiana	146498	63.3592	NC_036373
Coriandrum sativum	146519	62.7243	NC_029850
Legenere valdiviana	146691	59.746	NC_035364
Araucaria heterophylla	146723	63.3377	NC_026450
Schisandra sphenanthera	146843	60.4026	NC_037145
Schisandra chinensis	146859	60.3184	NC_034908
Pelatantheria scolopendrifolia	146860	63.4734	NC_035829
Actaea racemosa	146906	62.478	NC_034704
Angelica gigas	146916	62.4404	NC_029393
Angelica dahurica	146918	62.4757	NC_029392
Phedimus takesimensis	147048	61.9158	NC_026065
Angelica acutiloba	147074	62.4658	NC_029391
Cattleya liliputana	147092	62.6485	NC_032083
Pinguicula ehlersiae	147147	61.8062	NC_023463
Silene conica	147208	63.8776	NC_016729
Osyris alba	147253	62.3356	NC_027960
Ostericum grosseserratum	147282	62.4625	NC_028618
Corallorhiza odontorhiza	147317	63.0063	NC_025664
Kingdonia uniflora	147378	62.1633	NC_035873
Champereia manillana	147461	62.5867	NC_034931
Glehnia littoralis	147477	62.4897	NC_034645
Gastrochilus japonicus	147697	63.155	NC_035833
Oncidium sphacelatum	147761	62.863	NC_028148
Seseli montanum	147823	62.4253	NC_027451
Ledebouriella seseloides	147830	62.4738	NC_034643
Fragaria orientalis	147835	62.3993	NC_035501
Silene conoidea	147896	63.9787	NC_023358
Corallorhiza mertensiana	147941	63.2198	NC_025661
Vanilla pompona	148009	64.5974	NC_036809
Vanilla planifolia	148011	64.5959	NC_026778
Silene chalcedonica	148081	63.6517	NC_023359
Cattleya crispata	148343	62.7323	NC_026568
Onoclea sensibilis	148395	55.5848	NC_035860
Illicium oligandrum	148553	60.9527	NC_009600
Fragaria nipponica	148592	62.3849	NC_035500
Streptochaeta spicata	148617	61.7547	NC_033862
Corallorhiza bulbosa	148643	62.86	NC_025659
Gentiana tibetica	148765	62.2868	NC_030319
Apios americana	148772	64.5021	NC_025909
Gentiana crassicaulis	148776	62.2795	NC_027442
Dendrobium moniliforme	148778	62.4548	NC_035154
Phalaenopsis hybrid cultivar	148918	63.3355	NC_025593
Phalaenopsis equestris	148959	63.3476	NC_017609
Phalaenopsis aphrodite subsp. formosana	148964	63.3495	NC_007499
Gentiana straminea	148991	62.3051	NC_027441
Rhus chinensis	149011	62.2102	NC_033535
Takakia lepidozioides	149016	62.9322	NC_028738
Thrixspermum japonicum	149221	63.9287	NC_035831
Joinvillea ascendens	149327	61.895	NC_031427
Corallorhiza trifida	149384	62.7959	NC_025662
Tetragonia tetragonioides	149506	62.6978	NC_036991
Aster spathulifolius	149510	62.2915	NC_027434
Sedum oryzifolium	149609	62.3298	NC_027837
Stenogyne haliakalae GEO5	149736	61.4715	NC_029817
Stachys byzantina CL1004	149749	61.3026	NC_029825
Pastinaca pimpinellifolia	149758	62.5856	NC_027450
Hypodematium crenatum	149794	58.9076	NC_035857
Cymbidium macrorhizon	149850	62.9723	NC_029713
Gentiana macrophylla	149916	62.3349	NC_035719
Pseudophegopteris aurita	149917	56.9308	NC_035861
Cymbidium lancifolium	149945	62.8824	NC_029712
Ajuga reptans	149963	61.7132	NC_023102
Dendrobium parciflorum	150073	62.333	NC_035334
Stenogyne kanehoana HSJ14046	150115	61.4735	NC_029821
Stenogyne bifida HI0332	150129	61.4871	NC_029818
Haplostachys haplostachya HI0333	150130	61.4907	NC_029819
Phyllostegia velutina HI0361	150131	61.5296	NC_029820
Vanilla aphylla	150165	64.9779	NC_035320
Stachys sylvatica LVA358	150167	61.4383	NC_029824
Diplazium dushanense	150179	56.8415	NC_035851
Veronica persica	150198	62.0967	NC_031344
Austroblechnum melanocaulon	150202	56.3182	NC_035840
Cymbidium kanran	150217	62.905	NC_029711
Silene capitata	150224	63.6423	NC_035226
Andrographis paniculata	150249	61.7142	NC_022451
Stachys chamissonis CL1002	150254	61.4706	NC_029822
Stachys coccinea CL1003	150275	61.4953	NC_029823
Phaseolus vulgaris	150285	64.558	NC_009259
Adiantum shastense	150414	55.6504	NC_037478
Sedum sarmentosum	150448	62.2541	NC_023085
Achyrachaena mollis	150468	62.4286	NC_036504
Lathraea squamaria	150504	61.8701	NC_027838
Lamium album	150505	61.3913	NC_036971
Dracocephalum palmatum	150510	62.1733	NC_031874
Amaranthus hypochondriacus	150518	63.3864	NC_030770
Lotus japonicus Accession MG-20	150519	63.9693	NC_002694
Androsace paxiana	150528	62.8362	NC_034640
Dendrosenecio keniensis	150548	62.5296	NC_036832
Dendrosenecio keniodendron	150555	62.5386	NC_036831
Dendrosenecio battiscombei	150556	62.5375	NC_036833
Adiantum capillus-veneris	150568	57.9931	NC_004766
Amana wanzhensis	150576	63.2458	NC_034705
Gymnocarpos przewalskii	150636	63.4862	NC_036812
Woodsia polystichoides	150685	57.3793	NC_035865
Jacobaea vulgaris	150689	62.6801	NC_015543
Ageratina adenophora	150698	62.5383	NC_015621
Hinterhubera ericoides	150711	62.6723	NC_034884
Amana erythronioides	150714	63.2828	NC_034634
Amana anhuiensis	150723	63.2611	NC_034706
Spinacia oleracea	150725	63.1839	NC_002202
Dendrobium primulinum	150767	62.4195	NC_035321
Diplazium striatum	150779	56.1511	NC_035852
Soliva sessilis	150784	62.5351	NC_034851
Primula stenodonta	150785	62.8975	NC_034677
Amana edulis	150810	63.2684	NC_034707
Neocinnamomum delavayi	150850	61.1608	NC_036003
Primula veris	150856	62.9063	NC_031428
Primula sinensis	150859	62.7805	NC_030609
Diplostephium jenesanum	150924	62.4838	NC_034829
Deparia viridifrons	150939	56.2154	NC_035846
Artemisia annua	150952	62.5219	NC_034683
Chrysanthemum indicum	150972	62.5215	NC_020320
Athyrium opacum	150979	56.3078	NC_035841
Dryopteris decipiens	150987	57.3321	NC_035854
Woodsia macrochlaena	150987	57.2652	NC_035864
Matteuccia struthiopteris	151003	55.7393	NC_035859
Helianthus maximiliani	151007	62.3872	NC_023114
Diplopterygium glaucum	151007	59.8363	NC_024158
Deparia lancea	151011	56.0992	NC_035844
Chrysanthemum boreale	151012	62.5262	NC_037388
Helianthus grosseserratus	151017	62.387	NC_023108
Corallorhiza macrantha	151031	62.7898	NC_025660
Chrysanthemum x morifolium	151033	62.5194	NC_020092
Circaeaster agrestis	151033	61.8434	NC_035872
Erythronium sibiricum	151034	63.344	NC_035681
Helianthus strumosus	151044	62.3878	NC_023113
Helianthus hirsutus	151045	62.3894	NC_023111
Helianthus divaricatus	151045	62.3887	NC_023109
Helianthus tuberosus	151047	62.3905	NC_023112
Helianthus decapetalus	151048	62.4	NC_023110
Artemisia capillaris	151056	62.5404	NC_031400
Amana kuocangshanica	151058	63.3002	NC_034708
Helianthus giganteus	151066	62.3979	NC_023107
Athyrium sheareri	151068	56.4521	NC_035836
Helianthus argophyllus	151069	62.3741	NC_030275
Leontopodium leiolepis	151072	62.6787	NC_027835
Artemisia frigida	151076	62.5242	NC_020607
Helianthus annuus	151101	62.3841	CM007907
Dendrobium salaccense	151104	62.6946	NC_035332
Helianthus annuus	151104	62.3802	NC_007977
Diplazium dilatatum	151114	56.0954	NC_035850
Asplenium prolongatum	151115	59.153	NC_035838
Helianthus debilis	151117	62.3894	NC_030173
Deparia pycnosora	151126	55.991	NC_035845
Artemisia montana	151130	62.523	NC_025910
Macrothelypteris torresiana	151130	56.9192	NC_035858
Stegnogramma sagittifolia	151132	56.9959	NC_035863
Phragmipedium longifolium	151157	63.9262	NC_028149
Artemisia argyi	151192	62.5403	NC_030785
Diplostephium cayambense	151206	62.5147	NC_034886
Colobanthus apetalus	151228	63.3454	NC_036424
Pericallis hybrida	151267	62.6739	NC_031898
Cystopteris chinensis	151269	57.087	NC_035843
Vigna radiata var. radiata	151271	64.7652	NC_013843
Colobanthus quitensis	151276	63.3141	NC_028080
Taraxacum brevicorniculatum	151282	62.3214	NC_032056
Athyrium anisopterum	151284	56.0158	NC_035738
Dendrobium exile	151294	62.3237	NC_035343
Taraxacum platycarpum	151307	62.3097	NC_031395
Artemisia gmelinii	151318	62.5768	NC_031399
Athyrium sinense	151319	56.2408	NC_035839
Taraxacum obtusifrons	151322	62.3241	NC_031815
Taraxacum officinale	151324	62.314	NC_030772
Salvia miltiorrhiza	151328	61.9793	NC_020431
Lamium galeobdolon	151328	61.4586	NC_036972
Echinacanthus lofouensis	151333	61.2689	NC_035876
Torricellia angulata	151336	63.0075	NC_031509
Taraxacum kok-saghyz	151338	62.2917	NC_032057
Taraxacum amplum	151349	62.3209	NC_031816
Diplostephium violaceum	151387	62.5054	NC_034817
Diplostephium glandulosum	151400	62.5264	NC_034854
Passiflora edulis	151406	62.9922	NC_034285
Praxelis clematidea	151410	62.7667	NC_023833
Elaeagnus mollis	151428	63.0161	NC_036932
Taraxacum mongolicum	151451	62.3324	NC_031396
Diplaziopsis javanica	151496	57.4075	NC_035848
Fritillaria ussuriensis	151524	63.0455	NC_034369
Dendrobium aphyllum	151524	62.3994	NC_035322
Diplostephium ochraceum	151555	62.5476	NC_034903
Dendrobium denneanum	151565	62.3739	NC_035324
Haloxylon ammodendron	151570	63.4189	NC_027668
Christella appendiculata	151571	57.5123	NC_035842
Silene vulgaris	151583	63.7486	NC_016727
Haloxylon persicum	151586	63.4161	NC_027669
Diplazium bellum	151601	57.3611	NC_035849
Marsilea crenata	151628	57.7829	NC_022137
Cyrtomium falcatum	151628	57.6714	NC_028705
Silene paradoxa	151632	63.4385	NC_023360
Diplostephium oxapampanum	151637	62.5705	NC_034815
Silene noctiflora	151639	63.4942	NC_016728
Lilium bakerianum	151655	62.9409	NC_035592
Diplostephium gynoxyoides	151662	62.5503	NC_034862
Primula poissonii	151664	62.9813	NC_024543
Diplostephium crypteriophyllum	151665	62.6057	NC_034881
Dendrobium fimbriatum	151673	62.402	NC_035342
Alyssum desertorum	151677	63.6623	NC_034299
Vigna angularis	151683	64.8141	NC_021091
Diplostephium huertasii	151684	62.5768	NC_034812
Cyrtomium devexiscapulae	151684	57.6692	NC_028542
Dendrobium parishii	151689	62.4211	NC_035339
Galeopsis tetrahit	151690	61.5195	NC_036968
Fritillaria taipaiensis	151693	63.0332	NC_023247
Exostigma notobellidiastrum	151699	62.6715	NC_034864
Cyrtomium fortunei	151699	57.6807	NC_037510
Adenolobus garipensis	151705	63.0704	NC_036761
Caryopteris mongholica	151707	61.7598	NC_035729
Dendrobium crepidatum	151717	62.4254	NC_035331
Dendrobium jenkinsii	151717	62.3991	NC_035337
Oritrophium peruvianum	151723	62.6424	NC_034849
Hymenasplenium unilaterale	151723	58.0433	NC_035856
Agrostemma githago	151733	63.6012	NC_023357
Silene latifolia	151736	63.5716	NC_016730
Eclipta prostrata	151757	62.5151	NC_030773
Guizotia abyssinica	151762	62.3773	NC_010601
Diplostephium floribundum	151768	62.5837	NC_034857
Ampelopteris prolifera	151772	57.5653	NC_035835
Dendrobium wardianum	151788	62.3995	NC_035329
Dendrobium chrysanthum	151790	62.4369	NC_035336
Diplostephium eriophorum	151802	62.5683	NC_034874
Fritillaria persica	151803	63.0034	NC_037039
Dendrobium lohohense	151812	62.4364	NC_035338
Fritillaria yuminensis	151813	63.0289	NC_037209
Diplostephium revolutum	151823	62.6005	NC_034863
Westoniella kohkemperi	151824	62.6429	NC_034889
Pogostemon stellatus	151824	61.7788	NC_031434
Dendrobium gratiosissimum	151829	62.4255	NC_035327
Dendrobium spatella	151829	62.4182	NC_035333
Dendrobium brymerianum	151830	62.3981	NC_035323
Echinacea paradoxa	151837	62.411	NC_034320
Fritillaria meleagroides	151846	63.0487	NC_037040
Dendrobium henryi	151850	62.4439	NC_035335
Echinacea speciosa	151860	62.3917	NC_034325
Echinacea tennesseensis	151877	62.3867	NC_034326
Diplostephium jaramilloi	151879	62.5689	NC_034894
Echinacea pallida	151883	62.4198	NC_034321
Echinacea laevigata	151886	62.4027	NC_034322
Dendrobium falconeri	151890	62.5051	NC_035326
Lupinus luteus	151894	63.387	NC_023090
Diplostephium oblanceolatum	151895	62.588	NC_034830
Laennecia sophiifolia	151899	62.6548	NC_034877
Scutellaria insignis	151908	61.6228	NC_028533
Diplostephium tenuifolium	151911	62.5748	NC_034860
Echinacea atrorubens	151912	62.4223	NC_034323
Echinacea purpurea	151913	62.3989	NC_034327
Galinsoga quadriradiata	151917	62.3446	NC_031853
Fritillaria walujewii	151920	63.0556	NC_037215
Aztecaster matudae	151925	62.5908	NC_034898
Echinacea sanguinea	151926	62.4468	NC_034328
Diplaziopsis cavaleriana	151934	56.8984	NC_035847
Echinacea angustifolia	151935	62.4195	NC_034324
Dendrobium hercoglossum	151939	62.4376	NC_035328
Primula chrysochlora	151944	62.9614	NC_034678
Dendrobium devonianum	151945	62.4529	NC_035325
Fritillaria verticillata	151959	63.0479	NC_037217
Blakiella bartsiifolia	151965	62.7125	NC_034866
Diplostephium barclayanum	151974	62.6107	NC_034853
Diplostephium ericoides	151982	62.6008	NC_034870
Archibaccharis asperifolia	151984	62.6283	NC_034848
Fritillaria cirrhosa	151991	63.0518	NC_024728
Diplostephium hartwegii	151994	62.613	NC_034832
Iodes cirrhosa	151994	62.5604	NC_036304
Fritillaria tortifolia	152005	63.0328	NC_037214
Diplostephium goodspeedii	152006	62.6061	NC_034901
Llerasia caucana	152015	62.509	NC_034821
Dendrobium ellipsophyllum	152026	62.4979	NC_035340
Diplostephium rupestre	152027	62.6553	NC_034865
Diplostephium antioquense	152027	62.6106	NC_034876
Ambrosia trifida	152040	62.3783	NC_036810
Mentha longifolia	152041	62.1668	NC_032054
Diplostephium costaricense	152048	62.5908	NC_034879
Lagerstroemia subcostata	152049	62.4128	NC_034952
Dendrobium xichouense	152052	62.4898	NC_035341
Diplostephium serratifolium	152060	62.6115	NC_034826
Diplostephium lechleri	152067	62.6257	NC_034816
Lilium superbum	152069	62.9616	NC_026787
Diplostephium cajamarquillense	152070	62.6159	NC_034872
Fritillaria pallidiflora	152078	63.0163	NC_037216
Dendrobium wilsonii	152080	62.4875	NC_035330
Diplostephium espinosae	152091	62.6408	NC_034880
Mikania micrantha	152092	62.4201	NC_031833
Dendrobium candidum	152094	62.5199	NC_035745
Chenopodium quinoa	152099	62.7585	NC_034949
Dendrobium fanjingshanense	152108	62.4859	NC_035344
Androsace bulleyana	152110	62.7717	NC_034641
Diplostephium callilepis	152110	62.6251	NC_034856
Fritillaria karelinii	152112	63.0555	NC_037213
Utricularia gibba	152113	62.4253	NC_021449
Diplostephium azureum	152124	62.6574	NC_034882
Mentha spicata	152132	62.1526	NC_037247
Diplostephium jelskii	152142	62.6237	NC_034811
Diplostephium gnidioides	152144	62.6308	NC_034867
Fritillaria hupehensis	152145	63.03	NC_024736
Paeonia ostii	152153	61.6767	NC_036834
Fritillaria thunbergii	152155	63.0456	NC_034368
Diplostephium spinulosum	152155	62.6151	NC_034823
Homalosorus pycnocarpos	152159	56.7636	NC_035855
Chenopodium album	152167	62.7515	NC_034950
Diplostephium cinerascens	152169	62.6225	NC_034850
Diplostephium phylicoides	152172	62.6206	NC_034873
Diplostephium venezuelense	152173	62.6254	NC_034887
Lilium philadelphicum	152175	62.9295	NC_035990
Diplostephium obtusum	152179	62.6302	NC_034814
Dendrobium catenatum	152185	62.543	NC_037361
Diplostephium rhomboidale	152186	62.6365	NC_034859
Lagerstroemia guilinensis	152193	62.3754	NC_029885
Diplostephium hippophae	152197	62.6438	NC_034831
Diplostephium tachirense	152197	62.6379	NC_034825
Floscaldasia hypsophila	152200	62.6833	NC_034888
Lagerstroemia indica	152205	62.4086	NC_030484
Diplostephium sagasteguii	152214	62.6486	NC_034828
Ambrosia artemisiifolia	152215	62.3874	NC_035875
Diplostephium rosmarinifolium	152216	62.636	NC_034900
Glycine soja	152217	64.6242	NC_022868
Glycine gracilis	152218	64.627	NC_030329
Glycine max	152218	64.627	NC_007942
Dendrobium officinale	152221	62.5341	NC_024019
Diplostephium heterophyllum	152223	62.6305	NC_034896
Fritillaria eduardii	152224	63.0124	NC_037038
Elaeagnus macrophylla	152224	62.8981	NC_028066
Diplostephium glutinosum	152229	62.6641	NC_034875
Diplostephium pulchrum	152236	62.654	NC_034810
Impatiens piufanensis	152238	63.1774	NC_037401
Lagerstroemia floribunda	152240	62.2839	NC_031825
Diplostephium lacunosum	152247	62.6364	NC_034878
Diplostephium camargoanum	152249	62.6415	NC_034897
Heterothalamus alienus	152252	62.6435	NC_034855
Diplostephium schultzii	152252	62.6317	NC_034892
Diplostephium foliosissimum	152260	62.675	NC_034883
Diplostephium alveolatum	152265	62.6309	NC_034847
Diplostephium romeroi	152275	62.6518	NC_034885
Diplostephium apiculatum	152277	62.6477	NC_034902
Chenopodium quinoa	152282	62.771	CM008430
Diplostephium juajibioyi	152282	62.6482	NC_034822
Diplostephium oblongifolium	152282	62.6443	NC_034818
Diplostephium mutiscuanum	152282	62.6417	NC_034827
Scutellaria lateriflora	152283	61.6904	NC_034693
Lilium duchartrei	152287	62.9653	NC_035591
Diplostephium rhododendroides	152289	62.65	NC_034820
Diplostephium coriaceum	152290	62.662	NC_034899
Diplostephium haenkei	152292	62.6671	NC_034871
Diplostephium colombianum	152314	62.6548	NC_034861
Veronica nakaiana	152319	62.0678	NC_031153
Silene wilfordii	152320	63.3889	NC_035225
Diplostephium inesianum	152328	62.6569	NC_034895
Lagerstroemia intermedia	152330	62.4066	NC_034662
Baccharis tricuneata	152360	62.7022	NC_034868
Pteridium aquilinum subsp. aquilinum	152362	58.4739	NC_014348
Diplostephium frontinense	152365	62.6686	NC_034893
Laestadia muscicola	152366	62.7574	NC_034858
Glycine cyrtoloba	152381	64.6898	NC_021645
Allium obliquum	152387	63.2101	NC_037199
Ocimum basilicum	152407	62.1645	NC_035143
Iris sanguinea	152408	61.9548	NC_029227
Cardiocrinum cordatum	152410	62.8948	NC_033898
Vigna unguiculata	152415	64.7587	NC_018051
Cardiocrinum cathayanum	152416	62.9179	NC_033897
Scrophularia takesimensis	152425	61.9485	NC_026202
Parastrephia quadrangularis	152427	62.6916	NC_034890
Lagerstroemia fauriei	152440	62.3944	NC_029808
Aster altaicus	152446	62.6576	NC_034996
Saussurea chabyoungsanica	152446	62.3349	NC_036677
Diplostephium juniperinum	152454	62.6602	NC_034813
Diplostephium empetrifolium	152461	62.6534	NC_034891
Lagenophora cuchumatanica	152462	62.7514	NC_034819
Salvia rosmarinus	152462	62.0069	NC_027259
Lagerstroemia speciosa	152476	62.419	NC_031414
Asplenium pekinense	152479	58.8383	NC_035837
Saussurea polylepis	152488	62.3406	NC_036490
Saussurea involucrata	152490	62.3293	NC_029465
Dendrobium loddigesii	152493	62.6225	NC_036355
Isotoma hypocrateriformis	152505	60.6216	NC_035363
Glycine canescens	152518	64.6717	NC_021647
Diplostephium meyenii	152537	62.6812	NC_034824
Lobularia libyca	152542	63.5071	NC_035513
Cynara baetica	152548	62.2892	NC_028005
Cynara cornigera	152550	62.2917	NC_028006
Diplostephium cinereum	152554	62.686	NC_034869
Cirsium eriophorum	152557	62.2934	NC_036966
Centaurea diffusa	152559	62.269	NC_024286
Lilium amabile	152567	62.975	NC_035988
Cirsium vulgare	152567	62.3051	NC_036967
Cinnamomum camphora	152570	60.8606	NC_035882
Pedicularis ishidoyana	152571	61.9063	NC_029700
Lilium lancifolium	152574	62.9747	NC_035589
Cynara humilis	152585	62.2951	NC_027113
Perilla citriodora	152588	62.174	NC_030755
Lilium distichum	152598	62.9366	NC_029937
Scrophularia dentata	152600	62.0387	NC_036942
Perilla frutescens	152602	62.1761	NC_030756
Lilium cernuum	152604	62.9852	NC_034840
Dioscorea elephantipes	152609	62.8482	NC_009601
Glycine stenophita	152618	64.6837	NC_021646
Machilus yunnanensis	152622	60.8372	NC_028073
Lilium callosum	152626	62.9853	NC_035989
Rhachidosorus consimilis	152642	56.5336	NC_035862
Anoectochilus emeiensis	152650	63.1255	NC_033895
Cardiocrinum giganteum	152653	62.9323	NC_033896
Lilium hansonii	152655	62.9976	NC_027674
Perilla setoyensis	152656	62.1908	NC_030757
Lobularia maritima	152659	63.4879	NC_009274
Cinnamomum micranthum	152675	60.8692	NC_035802
Lilium brownii	152677	62.9925	NC_035588
Paeonia veitchii	152682	61.5842	NC_032401
Lilium bulbiferum	152686	62.9874	NC_037517
Paeonia ludlowii	152687	61.5619	NC_035623
Goodyera velutina	152692	63.0943	NC_029365
Paeonia obovata	152698	61.5647	NC_026076
Pogostemon yatabeanus	152707	61.838	NC_031433
Lilium tsingtauense	152710	63.0031	NC_027675
Galium aparine	152712	62.7207	NC_036969
Lilium sp. KHK-2014	152715	63.0043	NC_027679
Anaphalis sinica	152718	62.8806	NC_034648
Machilus balansae	152721	60.8495	NC_028074
Persea americana	152723	60.8959	NC_031189
Glycine tomentella	152728	64.6738	NC_021636
Scutellaria baicalensis	152731	61.6234	NC_027262
Laurus nobilis	152750	60.8773	NC_034700
Primula persimilis	152756	62.7818	NC_034331
Lactuca sativa	152765	62.4508	NC_007578
Cinnamomum verum	152766	60.8421	NC_035236
Lindera glauca	152780	60.8267	NC_035953
Glycine syndetika	152783	64.6754	NC_021650
Parthenium argentatum	152803	62.3921	NC_013553
Glycine dolichocarpa	152804	64.6874	NC_021648
Phoebe zhennan	152831	60.8522	NC_036143
Acorus gramineus	152849	61.2984	NC_026299
Phoebe chekiangensis	152849	60.8561	NC_034925
Phoebe bournei	152853	60.8526	NC_034926
Cirsium arvense	152855	62.2911	NC_036965
Phoebe omeiensis	152855	60.8649	NC_031190
Brassica napus ZY036	152860	63.6766	NC_016734
Scrophularia henryi	152868	62.0038	NC_036943
Aloe vera	152875	62.3437	NC_035506
Phoebe sheareri	152876	60.8637	NC_031191
Hydrocotyle sibthorpioides	152880	62.4863	NC_035502
Petroselinum crispum	152890	62.2179	NC_015821
Solms-laubachia eurycarpa	152895	63.9393	NC_034359
Castilleja paramensis	152926	61.8096	NC_031805
Veronicastrum sibiricum	152930	61.708	NC_031345
Dasiphora fruticosa	152931	62.7662	NC_036423
Papaver somniferum	152931	61.1446	NC_029434
Lilium leucanthum	152935	63.0085	NC_035590
Polygonatum sibiricum	152960	62.0548	NC_029485
Primulina eburnea	152963	62.3713	NC_036100
Millettia pinnata	152968	65.1738	NC_016708
Primulina liboensis	152989	62.3463	NC_036101
Conyza bonariensis	153014	62.8374	NC_035884
Glycine falcata	153023	64.6726	NC_021649
Dendrobium pendulum	153038	62.5165	NC_029705
Camelina sativa	153044	63.5196	NC_029337
Alseodaphne semecarpifolia	153051	60.9352	NC_037491
Ludisia discolor	153054	63.0307	NC_030540
Lilium taliense	153055	63.0545	NC_034370
Dendrobium strongylanthum	153059	62.3818	NC_027691
Alseodaphne huanglianshanensis	153070	60.9251	NC_037490
Salicornia bigelovii	153076	63.705	NC_027226
Haberlea rhodopensis	153099	62.246	NC_031852
Alseodaphne gracilis	153099	60.9462	NC_037489
Digitalis lanata	153108	61.439	NC_034688
Carthamus tinctorius	153114	62.2131	NC_030783
Lilium henryi	153119	63.0281	NC_035570
Erythranthe lutea	153150	62.2847	NC_030212
Allium sativum	153172	63.3229	NC_031829
Aloe maculata	153175	62.3783	NC_035505
Orychophragmus hupehensis	153184	63.6483	NC_033500
Dendrobium huoshanense	153188	62.5121	NC_028430
Atractylodes lancea	153201	62.3012	NC_037483
Silybum marianum	153202	62.2622	NC_028027
Streptocarpus teitensis	153207	62.4129	NC_037184
Hydrocotyle verticillata	153207	62.4058	NC_015818
Nothoceros aenigmaticus	153208	64.9836	NC_020259
Utricularia macrorhiza	153228	62.9604	NC_025653
Salicornia europaea	153232	63.7647	NC_027225
Lilium fargesii	153235	63.0887	NC_033908
Baccharis genistelloides	153239	62.8332	NC_034852
Goodyera procera	153240	62.3643	NC_029363
Primulina linearifolia	153244	62.3705	NC_036414
Orychophragmus taibaiensis	153255	63.6612	NC_033499
Atractylodes chinensis	153258	62.2969	NC_037484
Tecomaria capensis	153263	61.8564	NC_037462
Eutrema botschantzevii	153279	63.6526	NC_029379
Draba nemorosa JO21	153289	63.5284	NC_009272
Eutrema halophilum	153311	63.6595	NC_029378
Salpinga maranonensis	153311	62.5839	NC_031888
Salicornia brachiata	153324	63.7845	NC_027224
Sesamum indicum	153324	61.7966	NC_016433
Calycanthus floridus var. glaucus	153337	60.7316	NC_004993
Anethum graveolens	153356	62.3477	NC_029470
Raphanus sativus	153368	63.6606	NC_024469
Cakile arabica	153378	63.588	NC_030775
Gynochthodes officinalis	153398	61.9467	NC_028009
Primulina huaijiensis	153401	62.4148	NC_036413
Eutrema salsugineum	153407	63.664	NC_028170
Swertia mussotii	153431	61.8408	NC_031155
Iris gatesii	153441	62.1138	NC_024936
Lavandula angustifolia	153448	61.9611	NC_029370
Brassica rapa	153482	63.6394	NC_015139
Brassica juncea	153483	63.6403	NC_028272
Dorcoceras hygrometricum	153493	62.4055	NC_016468
Polygonatum cyrtonema	153503	62.817	NC_028429
Allium cepa	153538	63.1915	NC_024813
Megadenia pygmaea	153569	63.6652	NC_034357
Sinapis arvensis	153590	63.6897	NC_035303
Angiopteris angustifolia	153596	64.5401	NC_026300
Calycanthus chinensis	153596	60.7281	NC_037504
Rehmannia glutinosa	153622	62.0478	NC_034308
Foeniculum vulgare	153628	62.3513	NC_029469
Calanthe davidii	153629	63.0519	NC_037438
Scrophularia buergeriana	153631	62.0109	NC_031437
Brassica nigra	153633	63.6139	NC_030450
Dendrobium nobile	153660	62.5023	NC_029456
Arabis flagellosa Kifune	153673	63.5993	NC_037475
Galium mollugo	153677	62.822	NC_036970
Arabis hirsuta JO23	153689	63.6038	NC_009268
Veratrum patulum	153699	62.2893	NC_022715
Woodwardia unigemmata	153717	56.7862	NC_028543
Bunias erucago	153742	63.7685	NC_036110
Sinalliaria limprichtiana	153746	63.9548	NC_034287
Humulus lupulus	153751	63.2054	NC_028032
Primula kwangtungensis	153757	62.9266	NC_034371
Rehmannia elata	153772	62.0295	NC_034312
Patrinia saniculifolia	153775	61.5217	NC_036835
Tanaecium tetragonolobum	153776	61.7405	NC_027955
Orychophragmus diffusus	153777	63.7111	NC_033498
Metanarthecium luteoviride	153777	62.6231	NC_029214
Chuniophoenix nana	153806	62.5197	NC_029966
Acorus americanus	153819	61.4066	NC_010093
Acorus calamus	153821	61.4012	NC_007407
Mesembryanthemum crystallinum	153831	62.973	NC_029049
Cajanus cajan	153841	65.0652	NC_031429
Cannabis sativa	153854	63.3315	NC_027223
Lysionotus pauciflorus	153856	62.4968	NC_034660
Cannabis sativa	153871	63.3297	NC_026562
Eutrema heterophyllum	153876	63.6207	NC_028728
Cardamine oligosperma	153888	63.5917	NC_036963
Rehmannia henryi	153890	62.0534	NC_034309
Thlaspi arvense	153892	63.8545	NC_034362
Neotorularia korolkowii	153892	63.6641	NC_034361
Matthiola incana	153896	63.9191	NC_034358
Angiopteris evecta	153901	64.5194	NC_008829
Hesperis matronalis	153907	63.5839	NC_035511
Rehmannia piasezkii	153925	62.064	NC_034311
Ammopiptanthus mongolicus	153935	63.1331	NC_034742
Eutrema yunnanense	153948	63.5929	NC_028727
Habenaria pantlingiana	153951	63.4052	NC_026775
Dendrobium chrysotoxum	153953	62.3963	NC_028549
Tectona grandis	153953	62.1073	NC_020098
Sinalliaria limprichtiana	153964	63.9942	NC_034286
Dioscorea zingiberensis	153970	62.7811	NC_027090
Echites umbellatus	153970	61.9809	NC_025655
Dioscorea villosa	153974	62.8333	NC_034686
Schrenkiella parvula	153979	63.6385	NC_028726
Rehmannia solanifolia	153989	62.0583	NC_034310
Salvia japonica	153995	61.9955	NC_035233
Ionopsidium acaule	154000	63.7266	NC_029333
Bunias orientalis	154012	63.8567	NC_036111
Eremospatha macrocarpa	154031	62.2985	NC_029964
Lancea hirsuta	154045	62.1513	NC_037506
Pentalinon luteum	154053	61.6944	NC_025658
Rehmannia chingii	154055	62.0291	NC_033534
Allium victorialis	154074	62.984	NC_037240
Gynochthodes nanlingensis	154086	61.4754	NC_028614
Sophora alopecuroides	154108	63.425	NC_036102
Ammopiptanthus nanus	154140	63.164	NC_034743
Aethionema cordifolium	154168	63.3809	NC_009265
Huperzia serrata	154176	63.7246	NC_033874
Morettia canescens	154184	63.5578	NC_035514
Hydrocera triflora	154189	63.1037	NC_037400
Aethionema arabicum	154234	63.39	NC_034367
Braya humilis	154243	63.7909	NC_035515
Aethionema grandiflorum	154243	63.186	NC_009266
Ranunculus repens	154247	62.0621	NC_036976
Lupinus westianus	154270	63.5276	NC_036487
Solanum melongena	154289	62.1308	NC_030207
Corypha lecomtei	154342	62.3758	NC_029965
Goodyera schlechtendaliana	154348	62.8424	NC_029364
Arabidopsis suecica	154366	63.6908	NC_030350
Pterygopleurum neurophyllum	154369	62.3888	NC_033345
Huperzia lucidula	154373	63.7534	NC_006861
Megacarpaea delavayi	154401	63.7995	NC_034360
Lepidium meyenii	154403	63.6477	NC_034363
Paeonia delavayi	154405	61.6211	NC_035718
Hesperis sylvestris	154415	63.6221	NC_035512
Aletris fauriei	154440	62.4981	NC_033412
Ranunculus occidentalis	154474	62.2027	NC_031651
Arabidopsis thaliana	154478	63.7062	NC_000932
Allium prattii	154482	62.9814	NC_037432
Capsella bursa-pastoris JO22	154490	63.4455	NC_009270
Pachycladon cheesemanii	154498	63.5698	NC_021102
Arabidopsis cebennensis	154504	63.6391	NC_029335
Barbarea verna	154532	63.5661	NC_009269
Paulownia tomentosa	154540	62.0131	NC_031436
Maackia floribunda	154541	63.5301	NC_034774
Paulownia coreana	154545	62.0143	NC_031435
Cardamine amara	154561	63.5969	NC_036962
Cochlearia pyrenaica	154569	63.8821	NC_029331
Cochlearia islandica	154570	63.8694	NC_029254
Cochlearia borzaeana	154599	63.882	NC_029253
Capsella rubella	154601	63.4575	NC_027693
Arabidopsis arenicola	154610	63.6485	NC_030346
Rhexia virginica	154635	62.795	NC_031886
Capsella grandiflora	154638	63.4553	NC_028517
Polygonatum verticillatum	154639	62.1687	NC_028523
Arabidopsis umezawana	154645	63.6393	NC_030351
Arabidopsis halleri	154671	63.6402	NC_034366
Arabidopsis lyrata	154678	63.6496	NC_034365
Cardamine parviflora	154684	63.6181	NC_036964
Paphiopedilum dianthum	154699	64.0832	NC_036958
Aloysia citrodora	154699	60.8052	NC_034695
Cochlearia tridactylites	154718	63.8943	NC_029332
Anthriscus cerefolium	154719	62.5799	NC_015113
Arabidopsis croatica	154728	63.6414	NC_030347
Cocos nucifera	154731	62.5608	NC_022417
Olimarabidopsis pumila JS2	154737	63.5187	NC_009267
Lepidium virginicum JO26	154743	63.5299	NC_009273
Coffea canephora	154751	62.5288	NC_030053
Arabidopsis neglecta	154799	63.6264	NC_030348
Rhazya stricta	154841	62.3769	NC_024292
Nestegis apetala	154849	62.1677	NC_036983
Arabidopsis petrogena	154865	63.6212	NC_030349
Arabidopsis arenosa	154871	63.6278	NC_029334
Arabidopsis pedemontana	154895	63.6806	NC_029336
Pachycladon enysii	154896	63.6085	NC_018565
Nerium oleander	154903	61.9426	NC_025656
Arabidopsis lyrata subsp. lyrata MN47	154923	63.6497	NC_034379
Bomarea edulis	154925	61.8112	NC_025306
Pterogastra divaricata	154948	62.812	NC_031885
Catharanthus roseus	154950	61.909	NC_021423
Salix magnifica	154977	63.2642	NC_037424
Pugionium cornutum	154992	63.7652	NC_030516
Platanthera japonica	154995	63.0491	NC_037440
Aletris spicata	154999	62.5217	NC_033411
Pugionium dolabratum	155002	63.763	NC_030515
Oncinotis tenuiloba	155011	62.044	NC_025657
Cucumis hystrix	155031	63.0171	NC_023544
Cardamine resedifolia	155036	63.7039	NC_026446
Salix minjiangensis	155038	63.2864	NC_037425
Salix rehderiana	155051	63.2573	NC_037427
Syagrus coronata	155053	62.5393	NC_029241
Lonicera japonica	155078	61.4162	NC_026839
Salix taoensis	155085	63.2601	NC_037429
Thalictrum coreanum	155088	61.5573	NC_026103
Populus nigra	155096	63.1873	NC_037416
Lindenbergia philippensis	155103	62.2058	NC_022859
Nasturtium officinale	155105	63.6298	NC_009275
Rhynchanthera bracteata	155108	62.9935	NC_031887
Nepsera aquatica	155110	62.9476	NC_031883
Salix hypoleuca	155126	63.2795	NC_037423
Ranunculus macranthus	155129	62.1167	NC_008796
Salix rorida	155144	63.2799	NC_037428
Pedicularis cheilanthifolia	155159	62.3212	NC_036010
Forestiera isabelae	155161	62.0633	NC_036981
Coffea arabica	155189	62.5689	NC_008535
Cordyline indivisa	155196	62.1595	NC_035998
Crucihimalaya wallichii JS5	155199	63.5777	NC_009271
Salix suchowensis	155214	63.2662	NC_026462
Solanum pennellii	155254	62.1395	KY887589
Cucumis sativus	155293	62.9211	NC_007144
Premna microphylla	155293	62.1284	NC_026291
Solanum tuberosum	155296	62.1162	NC_008096
Carissa macrocarpa	155297	61.9619	NC_033354
Eugeissona tristis	155304	62.3422	NC_029963
Cymbidium mannii	155308	63.0631	NC_021433
Cremastra appendiculata	155320	62.8103	NC_037439
Habenaria radiata	155353	63.4368	NC_035834
Populus rotundifolia	155355	63.2294	NC_033876
Solanum bulbocastanum	155371	62.1191	NC_007943
Emmenopterys henryi	155379	62.3553	NC_036300
Solanum pennellii	155381	62.1505	HG975452
Alniphyllum eberhardtii	155384	62.899	NC_031892
Lysimachia coreana	155386	62.875	NC_026197
Dioscorea rotundata	155406	62.7974	NC_024170
Pleurospermum camtschaticum	155415	62.0268	NC_033343
Solanum nigrum	155432	62.0973	NC_028070
Chionanthus parkinsonii	155436	62.1922	NC_036979
Solanum pimpinellifolium	155442	62.1228	NC_026882
Carum carvi	155449	62.2301	NC_029889
Camassia scilloides	155453	62.4343	NC_032700
Solanum lycopersicum	155461	62.1397	AM087200
Solanum lycopersicum	155461	62.1391	HG975525
Solanum lycopersicum	155461	62.1384	NC_007898
Solanum lycopersicum	155461	62.1384	DQ347959
Solanum habrochaites	155465	62.1336	NC_026879
Solanum galapagense	155474	62.1287	NC_026878
Geum rupestre	155479	63.1892	NC_037392
Coptis chinensis	155484	61.8257	NC_036485
Tofieldia thibetica	155512	62.5553	NC_029813
Solanum neorickii	155513	62.1266	NC_026880
Solanum cheesmaniae	155520	62.1341	NC_026876
Aconitum longecassidatum	155524	61.9429	NC_035894
Solanum commersonii Lz3.2	155525	62.1238	NC_028069
Solanum chilense	155528	62.1477	NC_026877
Salix oreinoma	155531	63.3031	NC_035743
Solanum berthaultii	155533	62.1206	NC_034951
Fraxinus chiisanensis	155541	62.1058	NC_037171
Cymbidium sinense	155548	62.9658	NC_021430
Fragaria x ananassa	155549	62.7654	NC_035961
Salix paraplesia	155553	63.3392	NC_037426
Fragaria iinumae	155554	62.8476	NC_024258
Solanum peruvianum	155561	62.155	NC_026881
Chionanthus rupicola	155563	62.1902	NC_036980
Przewalskia tangutica	155570	62.3906	NC_036733
Trapa maximowiczii	155577	63.6026	NC_037023
Solanum dulcamara	155580	62.2021	NC_035724
Noronhia lowryi	155582	62.1248	NC_036984
Salix purpurea	155590	63.3145	KP019639
Mitragyna speciosa	155600	62.482	NC_034698
Fragaria chiloensis	155603	62.7764	NC_019601
Cardamine impatiens	155611	63.669	NC_026445
Fatsia japonica	155613	62.0874	NC_027685
Syringa vulgaris	155616	62.1048	NC_036987
Fragaria virginiana	155621	62.7743	NC_019602
Bupleurum latissimum	155621	62.3592	NC_033346
Fraxinus excelsior	155622	62.175	NC_037446
Aconitum finetianum	155625	61.9502	NC_036358
Cymbidium tortisepalum	155627	62.973	NC_021431
Aconitum pseudolaeve	155628	61.9522	NC_035892
Oziroe biflora	155633	62.355	NC_032709
Fragaria pentaphylla	155640	62.7493	NC_034347
Goodyera fumata	155643	62.725	NC_026773
Schrebera arborea	155657	62.206	NC_036986
Salix arbutifolia	155661	63.3203	NC_036718
Tigridiopalma magnifica	155663	62.8948	NC_036021
Salix tetrasperma	155671	63.3342	NC_035744
Aconitum austrokoreense	155682	61.8851	NC_031410
Chionanthus retusus	155687	62.2422	NC_035000
Aconitum monanthum	155688	61.8885	NC_031423
Fragaria vesca subsp. vesca	155691	62.7872	NC_015206
Geranium maderense	155694	60.9259	NC_029999
Graffenrieda moritziana	155733	63.0104	NC_031879
Aconitum carmichaelii	155737	61.8613	NC_030761
Nicotiana tomentosiformis	155745	62.2094	NC_007602
Cucumis x hytivus	155760	63.0849	NC_033871
Myriopteris lindheimeri	155770	57.2755	NC_014592
Populus lasiocarpa	155783	63.1481	NC_036040
Geranium palmatum	155794	60.9266	NC_014573
Anthericum ramosum	155812	62.7076	NC_035972
Hesperelaea palmeri	155820	62.191	NC_025787
Acrocomia aculeata	155829	62.4665	NC_037084
Aconitum ciliare	155832	61.8641	NC_031420
Daucus carota subsp. sativus	155848	62.3261	CM004358
Populus davidiana	155853	63.2372	NC_032717
Blakea schlimii	155862	62.9422	NC_031877
Olea europaea subsp. cuspidata	155862	62.1896	NC_015604
Aconitum kusnezoffii	155862	61.8688	NC_031422
Nicotiana undulata	155863	62.1219	NC_016068
Datura stramonium	155871	62.1244	NC_018117
Aesculus wangii	155871	62.0455	NC_035955
Olea europaea var. sylvestris	155875	62.1896	NC_015401
Nicotiana attenuata	155886	62.1384	MF577082
Olea europaea	155888	62.1985	NC_013707
Zingiber spectabile	155890	63.7129	NC_020363
Olea europaea subsp. maroccana	155896	62.1947	NC_015623
Olea exasperata	155897	62.1911	NC_036985
Daucus carota subsp. sativus	155911	62.3445	NC_008325
Aconitum chiisanense	155934	61.8961	NC_029829
Nicotiana sylvestris	155941	62.1536	NC_007500
Nicotiana sylvestris	155941	62.1536	AB237912
Olea woodiana subsp. woodiana	155942	62.2058	NC_015608
Nicotiana tabacum	155943	62.1535	NC_001879
Barthea barthei	155951	63.0147	NC_035661
Neottia pinetorum	155959	62.4773	NC_030710
Averrhoa carambola	155965	63.4617	NC_033350
Abeliophyllum distichum	155982	62.1815	NC_031445
Bupleurum falcatum	155989	62.3422	KM207676
Panax vietnamensis	155993	61.9464	NC_028704
Eriocnema fulva	155994	62.9806	NC_031878
Cucumis melo	156017	63.0797	NC_015983
Polygonatum stenophyllum	156028	62.3254	NC_035995
Bergenia scopulosa	156041	62.2349	NC_036061
Masdevallia picturata	156045	63.1164	NC_026777
Bertolonia acuminata	156045	63.0331	NC_031876
Commiphora wightii	156064	62.0457	NC_036978
Panax stipuleanatus	156064	61.9688	NC_030598
Populus tremula	156067	63.2434	NC_027425
Dalbergia hainanensis	156073	63.9124	NC_036961
Nicotiana otophora	156073	62.2939	NC_032724
Populus qiongdaoensis	156074	63.2501	NC_031398
Barnardia japonica	156079	62.3223	NC_035997
Panax quinquefolius	156088	61.926	NC_027456
Bupleurum boissieuanum	156108	62.3395	NC_036017
Aconitum angustius	156109	61.9503	NC_036357
Apostasia wallichii	156126	63.9343	NC_036260
Hippophae rhamnoides	156132	63.3387	NC_035548
Pentaphylax euryoides	156132	62.8853	NC_035710
Salix chaenomeloides	156154	63.333	NC_037422
Erythropalum scandens	156154	62.0061	NC_036759
Yucca schidigera	156158	62.1108	NC_032714
Merianthera pulchra	156168	63.0328	NC_031881
Panax japonicus	156188	61.9318	NC_028703
Scopolia parviflora	156193	62.3844	NC_030282
Burmannia coelestis	156223	65.3233	NC_036660
Potamogeton perfoliatus	156226	63.5438	NC_029814
Ceratophyllum demersum	156252	61.7778	NC_009962
Campynema lineare	156261	63.0778	NC_026785
Acer truncatum	156262	62.1104	NC_037211
Cymbidium tracyanum	156286	63.1989	NC_021432
Polyspora dalgleishiana	156292	62.6967	NC_035648
Adinandra millettii	156311	62.5727	NC_035678
Panax ginseng	156318	61.8918	NC_006290
Prinsepia utilis	156328	63.1147	NC_021455
Aralia undulata	156333	61.9025	NC_022810
Schefflera delavayi	156341	62.1705	NC_022813
Metapanax delavayi	156343	62.0667	NC_022812
Adinandra angustifolia	156344	62.5755	NC_035653
Actinidia chinensis	156346	62.8037	NC_026690
Opisthocentra clidemioides	156352	62.9688	NC_031884
Dendropanax morbifer	156366	62.0128	NC_027607
Najas flexilis	156366	61.7833	NC_021936
Mauritia flexuosa	156367	62.5477	NC_029947
Forsythia x intermedia	156376	62.202	NC_036982
Panax notoginseng	156387	61.9201	NC_026447
Arachis hypogaea	156391	63.6322	NC_037358
Schizaea pectinata	156392	55.6333	NC_035808
Albuca kirkii	156401	62.3417	NC_032697
Forsythia suspensa	156404	62.2081	NC_036367
Populus trinervis	156409	63.2981	NC_037420
Kalopanax septemlobus	156413	62.0511	NC_022814
Burmannia disticha	156422	64.9896	NC_036661
Populus yunnanensis	156445	63.2542	NC_037421
Allomaieta villosa	156452	63.0884	NC_031875
Brassaiopsis hainla	156459	62.0827	NC_022811
Colchicum autumnale	156462	62.4356	NC_030064
Acer buergerianum	156477	62.1203	NC_034744
Actinidia arguta	156484	62.7681	NC_034913
Populus alba	156505	63.258	NC_008235
Ardisia polysticta	156506	62.9299	NC_021121
Viola seoulensis	156507	63.7039	NC_026986
Melianthus villosus	156510	62.7053	NC_023256
Trompettia cardenasiana	156510	62.104	NC_029746
Henriettea barkeri	156527	63.1105	NC_031880
Portulaca oleracea	156533	63.5904	NC_036236
Neottia fugongensis	156536	62.5562	NC_030711
Flacourtia indica	156542	63.275	NC_037410
Rosa chinensis	156546	62.7624	CM009590
Dunalia obovata	156559	62.3075	NC_026563
Iochroma nitidum	156574	62.3022	NC_026567
Camellia danzaiensis	156576	62.6603	NC_022460
Hosta ventricosa	156577	62.195	NC_032706
Actinidia polygama	156583	62.7546	NC_031186
Capsicum lycianthoides	156583	62.2443	NC_026551
Camellia pitardii	156585	62.6644	NC_022462
Apterosperma oblata	156590	62.6796	NC_035641
Camellia yunnanensis	156592	62.675	NC_022463
Acer miaotaiense	156595	62.115	NC_030343
Nandina domestica	156599	61.6754	NC_008336
Schizaea elegans	156603	56.7039	NC_035807
Schoenolirion croceum	156605	62.097	NC_032710
Camellia japonica S288C	156606	62.6828	NC_036830
Trillium cuneatum	156610	62.4769	NC_027185
Pentactina rupicola	156612	63.2046	NC_016921
Camellia cuspidata	156618	62.6869	NC_022459
Salix interior	156620	63.0009	NC_024681
Populus simonii	156637	63.2909	NC_037418
Populus tremula x Populus alba	156641	63.2721	NC_028504
Triolena amazonica	156652	63.1017	NC_031890
Alsophila spinulosa	156661	59.5656	NC_012818
Isatis tinctoria	156670	63.4876	NC_028415
Hosta minor	156674	62.1954	NC_035999
Poliothyrsis sinensis	156680	63.1676	NC_037412
Itoa orientalis	156682	63.1706	NC_037411
Melastoma candidum	156682	62.8343	NC_034716
Milla biflora	156684	62.3874	NC_036000
Schefflera heptaphylla	156685	62.0723	NC_029764
Penthorum chinense	156686	62.7229	NC_023086
Atropa belladonna Ab5p(kan)	156687	62.4359	NC_004561
Dendropanax dentiger	156687	62.0422	NC_026546
Populus angustifolia	156698	63.3033	NC_037413
Asparagus officinalis	156699	62.4114	NC_034777
Elodea canadensis	156700	63.0038	NC_018541
Physalis peruviana	156706	62.4628	NC_026570
Linum usitatissimum	156721	62.529	NC_036356
Polyspora hainanensis	156725	62.6939	NC_035693
Iochroma umbellatum	156730	62.3218	NC_030044
Dunalia brachyacantha	156730	62.2944	NC_026906
Pyrenaria oblongicarpa	156732	62.6732	NC_035694
Paris polyphylla var. yunnanensis	156737	62.6897	NC_033518
Actinidia deliciosa	156741	62.8387	NC_026691
Populus szechuanica	156742	63.2613	NC_037419
Xerophyllum tenax	156746	62.1502	NC_027158
Rosa roxburghii	156749	62.7666	NC_032038
Camellia elongata	156751	62.6816	NC_035652
Paris marmorata	156755	62.636	NC_033516
Populus euphratica	156766	63.2854	NC_024747
Eleutherococcus senticosus	156768	62.0497	NC_016430
Polyspora axillaris	156770	62.7014	NC_035645
Oresitrophe rupifraga	156773	62.2454	NC_037514
Capsicum annuum	156781	62.2748	NC_018552
Tibouchina longifolia	156789	62.9183	NC_031889
Iochroma cyaneum	156791	62.3135	NC_030178
Nolina atopocarpa	156792	62.382	NC_032708
Populus koreana	156800	63.3144	NC_037414
Capsicum chinense	156807	62.2721	NC_030543
Capsicum tovarii	156816	62.2787	NC_033526
Capsicum frutescens	156817	62.279	NC_028007
Salix babylonica	156819	63.3507	NC_028350
Iochroma tingoanum	156823	62.327	NC_027177
Cistanthe longiscapa	156830	63.2978	NC_035140
Iochroma lehmannii	156835	62.3464	NC_030167
Acnistus arborescens x Iochroma cyaneum	156841	62.3204	NC_030056
Trillium tschonoskii	156852	62.5347	NC_027739
Acer griseum	156857	62.0903	NC_034346
Iochroma stenanthum	156858	62.3545	NC_026574
Pyrenaria microcarpa	156864	62.6689	NC_035686
Anemarrhena asphodeloides	156867	62.152	NC_032698
Dunalia solanacea	156869	62.3495	NC_027099
Asparagus schoberioides	156875	62.4325	NC_035969
Kolkwitzia amabilis	156875	61.5522	NC_029874
Monsonia emarginata	156877	59.8367	NC_029694
Camellia impressinervis	156892	62.6724	NC_022461
Paris cronquistii	156896	62.7078	NC_033511
Acnistus arborescens	156898	62.3227	NC_030185
Cymbidium aloifolium	156904	63.131	NC_021429
Citrullus lanatus subsp. vulgaris	156906	62.8211	NC_032008
Citrullus mucosospermus	156907	62.8194	NC_033899
Tutcheria championii	156912	62.6835	NC_035687
Peucedanum insolens	156912	62.3165	NC_033344
Saracha punctata	156925	62.3202	NC_026694
Pyrenaria pingpienensis	156926	62.6875	NC_035642
Capsicum eximium	156947	62.2771	NC_033527
Capsicum galapagoense	156959	62.2851	NC_033524
Mukdenia rossii	156960	62.2878	NC_037495
Camellia mairei	156963	62.6804	NC_035688
Actinidia eriantha	156964	62.8099	NC_034914
Camellia chekiangoleosa	156971	62.7116	NC_037472
Camellia reticulata	156971	62.6918	NC_024663
Camellia oleifera	156971	62.6912	NC_023084
Iochroma salpoanum	156971	62.3287	NC_030168
Elaeis guineensis	156973	62.5955	NC_017602
Camellia taliensis	156974	62.6804	NC_022264
Neottia ovata	156978	62.4419	NC_030712
Ginkgo biloba	156988	60.4384	NC_016986
Symplocos paniculata	156992	62.5223	NC_035702
Capsicum chacoense	156995	62.3243	NC_033525
Iochroma australe	156996	62.3341	NC_029833
Camellia crapnelliana	156997	62.7018	NC_024541
Lepisorus clathratus	156998	58.1944	NC_035739
Iochroma loxense	157002	62.3285	NC_026726
Citrullus amarus	157008	62.8261	NC_035974
Aphyllanthes monspeliensis	157009	63.1932	NC_035968
Cephalanthera humilis	157011	62.6848	NC_030706
Idesia polycarpa	157017	63.2925	NC_032060
Eriolarynx fasciculata	157025	62.3066	NC_030171
Adenocalymma biternatum	157025	61.7736	NC_036496
Aconitum coreanum	157029	62.0013	NC_031421
Populus trichocarpa	157033	63.3249	NC_009143
Coccinia grandis	157035	62.9331	NC_031834
Camellia azalea	157039	62.7029	NC_035574
Epimedium dolichostemon	157039	61.1988	NC_029942
Beschorneria septentrionalis	157043	62.2282	NC_032699
Acer davidii	157044	62.059	NC_030331
Salacca ramosiana	157047	62.6137	NC_029954
Cypripedium macranthos	157050	62.1783	NC_024421
Iochroma ellipticum	157052	62.3087	NC_030177
Agapanthus coddii	157055	62.5424	NC_035971
Polyspora longicarpa	157058	62.7004	NC_035689
Pyrenaria khasiana	157065	62.7454	NC_035644
Polyspora speciosa	157066	62.7074	NC_035643
Symplocos costaricana	157068	62.4551	NC_035708
Camellia szechuanensis	157070	62.6975	NC_035651
Dipteronia dyeriana	157071	62.0318	NC_031899
Sinadoxa corydalifolia	157074	62.2445	NC_032040
Camellia pubicosta	157076	62.6977	NC_024662
Paris mairei	157079	62.7149	NC_033515
Dipteronia sinensis	157080	62.218	NC_029338
Adenocalymma subspicatum	157089	62.2685	NC_036502
Populus balsamifera	157094	63.3481	NC_024735
Pyrenaria diospyricarpa	157102	62.7541	NC_035704
Camellia leptophylla	157102	62.7007	NC_024660
Camellia sinensis	157103	62.6939	NC_020019
Camellia petelotii	157121	62.7096	NC_024661
Pyrenaria menglaensis	157122	62.75	NC_035639
Camellia grandibracteata	157127	62.7085	NC_024659
Melliodendron xylocarpum	157131	62.7896	NC_035712
Citrullus rehmii	157135	62.8593	NC_035975
Hesperocallis undulata	157143	62.3267	NC_032704
Lagenaria siceraria	157145	62.8986	NC_036808
Citrullus colocynthis	157147	62.8583	NC_035727
Populus laurifolia	157168	63.3539	NC_037415
Epimedium pseudowushanense	157168	61.2281	NC_029945
Veitchia arecina	157170	62.5266	NC_029950
Paris dunniana	157174	62.7343	NC_033512
Maianthemum bicolor	157176	62.4001	NC_035970
Rosa praelucens	157186	62.7709	NC_037492
Cymbidium goeringii	157192	63.1463	NC_028524
Acer morrisonense	157197	62.1812	NC_029371
Cucurbita maxima	157204	62.8839	NC_036505
Gordonia fruticosa	157214	62.7247	NC_035700
Aconitum sinomontanum	157215	62.0055	NC_036359
Miconia dodecandra	157216	62.9739	NC_031882
Epimedium koreanum	157218	61.2767	NC_029943
Schima brevipedicellata	157227	62.5586	NC_035537
Adoxa moschatellina	157238	62.214	NC_034792
Ranunculus reptans	157239	62.0698	NC_036977
Schima wallichii	157240	62.563	NC_035546
Schima argentea	157245	62.5648	NC_035536
Schima khasiana	157252	62.5652	NC_035539
Schima superba	157254	62.558	NC_035545
Lygodium japonicum	157260	59.3578	NC_022136
Cymbidium faberi	157262	63.0152	NC_027743
Calamus caryotoides	157270	62.6362	NC_020365
Agave americana	157274	62.1584	NC_032053
Schima noronhae	157278	62.565	NC_035541
Schima multibracteata	157278	62.5593	NC_035540
Schima remotiserrata	157284	62.5658	NC_035542
Schima crenata	157288	62.561	NC_035538
Chlorogalum pomeridianum	157288	62.2679	NC_032701
Viviania marifolia	157291	62.3367	NC_023259
Hansenia oviformis	157292	62.103	NC_035055
Schima sinensis	157297	62.5479	NC_035544
Schima sericans	157302	62.551	NC_035543
Manfreda virginica	157308	62.1945	NC_032707
Francoa sonchifolia	157312	62.3633	NC_021101
Gymnaconitum gymnandrum	157327	61.9201	NC_033341
Trillium maculatum	157359	62.5201	NC_027738
Euonymus hamiltonianus	157360	62.7485	NC_037518
Acer palmatum	157367	62.1636	NC_034932
Paris verticillata	157379	62.4067	NC_024560
Bletilla striata	157393	62.7696	NC_028422
Hesperaloe parviflora	157393	62.2467	NC_032703
Symplocos ovatilobata	157417	62.5587	NC_036489
Masdevallia coccinea	157423	63.1858	NC_026541
Actinidia kolomikta	157425	62.8166	NC_034915
Bletilla ochracea	157431	62.7068	NC_029483
Hydrangea petiolaris	157434	62.1848	NC_034935
Populus fremontii	157446	63.3252	NC_024734
Hesperaloe campanulata	157446	62.2499	NC_032702
Agave attenuata	157451	62.1647	NC_032696
Cymbidium ensifolium	157484	62.7365	NC_028525
Hydrangea luteovenosa	157494	62.1205	NC_035662
Tetradoxa omeiensis	157502	62.3091	NC_034793
Paspalum paniculatum	157507	60.9624	NC_036114
Diospyros strigosa	157508	62.6114	NC_035654
Metroxylon warburgii	157516	62.6457	NC_029959
Paris fargesii	157518	62.7122	NC_033513
Diplopanax stachyanthus	157522	62.2161	NC_029750
Diospyros lotus	157590	62.6144	NC_030786
Diospyros glaucifolia	157593	62.617	NC_030784
Paris luquanensis	157594	62.7016	NC_033514
Gynostemma longipes	157601	63.0301	NC_036140
Gordonia brandegeei	157604	62.6095	NC_035646
Viburnum utile	157620	61.8951	NC_032296
Franklinia alatamaha	157626	62.5582	NC_035692
Euonymus japonicus	157637	62.7353	NC_028067
Cucurbita moschata	157644	62.8581	NC_036506
Actinidia tetramera	157659	62.9669	NC_031187
Gynostemma pubescens	157666	63.0085	NC_036142
Prunus cerasoides	157685	63.2787	NC_035891
Gynostemma 'burmanicum'	157687	63.0039	NC_036141
Tarenaya hassleriana	157688	64.1653	NC_034364
Podococcus barteri	157688	62.3427	NC_027276
Hydrangea hydrangeoides	157692	62.1725	NC_034936
Epimedium lishihchenii	157692	61.2225	NC_029944
Euonymus schensianus	157702	62.809	NC_036019
Gordonia lasianthus	157705	62.6137	NC_035699
Pigafetta elata	157708	62.6385	NC_029956
Prunus mume	157712	63.2533	NC_023798
Cryptocarya chinensis	157718	60.9328	NC_036002
Stephania japonica	157719	61.7674	NC_029432
Prunus dulcis	157723	63.2286	NC_034696
Diospyros oleifera	157724	62.6062	NC_030787
Hydrangea serrata	157730	62.1182	NC_034934
Prunus kansuensis	157736	63.243	NC_023956
Diospyros blancoi	157745	62.6169	NC_033502
Ternstroemia gymnanthera	157753	62.8121	NC_035706
Chloranthus spicatus	157772	61.1122	NC_009598
Mangifera indica	157780	62.108	NC_035239
Diospyros kaki	157784	62.6058	NC_030789
Yucca filamentosa	157785	62.2207	NC_032712
Prunus persica	157790	63.2404	NC_014697
Gynostemma pentagynum	157791	63.0461	NC_036136
Adenocalymma nodosum	157791	61.7526	NC_037458
Yucca queretaroensis	157814	62.2435	NC_032713
Akebia quinata	157817	61.3324	NC_033913
Pseudophoenix vinifera	157829	62.6786	NC_020364
Hesperoyucca whipplei	157832	62.2117	NC_032705
Prunus pseudocerasus	157834	63.2684	NC_030599
Diospyros dumetorum	157834	62.6804	NC_035703
Sabal domingensis	157835	62.5387	NC_026444
Paris polyphylla var. chinensis	157847	62.8007	NC_033517
Prunus maximowiczii	157852	63.2719	NC_026981
Dasypogon bromeliifolius	157858	62.8369	NC_020367
Prunus yedoensis	157859	63.2698	NC_026980
Washingtonia robusta	157866	62.6455	NC_029974
Colpothrinax cookii	157867	62.7034	NC_028026
Bruinsmia polysperma	157879	63.2307	NC_030180
Luzuriaga radicans	157885	61.9318	NC_025333
Paris quadrifolia	157907	62.3481	NC_033520
Pritchardia thurstonii	157909	62.7197	NC_029955
Pouteria campechiana	157922	63.1502	NC_033501
Gloriosa superba	157924	62.4041	NC_030065
Gynostemma caulopterum	157937	63.003	NC_036135
Sinopodophyllum hexandrum	157940	61.4955	NC_027732
Adenocalymma allamandiflorum	157953	61.8051	NC_036494
Gynostemma compressum	157960	63.021	NC_037179
Yucca brevifolia	158008	62.2367	NC_032711
Prunus humilis	158012	63.3173	NC_035880
Populus ilicifolia	158017	63.4641	NC_031371
Japonolirion osense	158020	61.8441	NC_036154
Styrax grandiflorus	158052	63.0672	NC_030539
Stewartia rostrata	158077	62.7327	NC_035698
Populus wilsonii	158080	63.3572	NC_037223
Adenocalymma pedunculatum	158103	62.3688	NC_036500
Dolichandra cynanchoides	158110	61.9056	NC_037460
Xanthorrhoea preissii	158116	62.1379	NC_035996
Borassodendron machadonis	158144	62.5613	NC_029969
Zanthoxylum piperitum	158154	61.535	NC_027939
Stewartia sinensis	158177	62.7386	NC_035640
Magnolia liliifera	158177	60.8521	NC_023238
Garcinia mangostana	158179	63.9263	NC_036341
Anneslea fragrans	158182	62.772	NC_035709
Bismarckia nobilis	158210	62.5308	NC_020366
Paris vietnamensis	158224	62.8261	NC_033519
Heloniopsis tubiflora	158229	62.5037	NC_027159
Crudia harmsiana	158253	63.5862	NC_036743
Gynostemma laxiflorum	158273	63.0341	NC_036134
Epimedium sagittatum	158273	61.1488	NC_029428
Sambucus williamsii	158305	62.0732	NC_033878
Akebia trifoliata	158339	61.3494	NC_029427
Fagus engleriana	158346	62.9185	NC_036929
Crithmum maritimum	158355	62.4458	NC_015804
Prunus tomentosa	158356	63.147	NC_036394
Plantago maritima	158358	61.3685	NC_028519
Barclaya longifolia	158360	60.867	NC_035633
Helwingia himalaica	158362	62.3079	NC_031370
Stewartia malacodendron	158376	62.7197	NC_035691
Nypa fruticans	158391	62.83	NC_029958
Zanthoxylum bungeanum	158401	61.5356	NC_031386
Stewartia pseudocamellia	158409	62.7464	NC_035697
Neojobertia candolleana	158409	61.857	NC_036503
Stewartia crassifolia	158410	62.7037	NC_035647
Stewartia ovata	158416	62.774	NC_035695
Stewartia calcicola	158425	62.6921	NC_035696
Stewartia rubiginosa	158433	62.7704	NC_035650
Phellodendron amurense	158442	61.6181	NC_035551
Eugenia uniflora	158445	63.02	NC_027744
Stewartia cordifolia	158450	62.6923	NC_035649
Leucothrinax morrisii	158452	62.6808	NC_029961
Morus mongolica	158459	63.7061	NC_025772
Zanthoxylum simulans	158461	61.5338	NC_037482
Phoenix dactylifera	158462	62.7671	NC_013991
Morus indica	158484	63.626	NC_008359
Trithrinax brasiliensis	158487	62.6657	NC_029951
Ligusticum tenuissimum	158500	62.3912	NC_029394
Acoelorraphe wrightii	158503	62.6865	NC_029973
Stewartia pteropetiolata	158520	62.7315	NC_035690
Symplocarpus renifolius	158521	62.6699	NC_033970
Carludovica palmata	158545	62.2555	NC_026786
Populus pruinosa	158551	63.4061	NC_037417
Trillium decumbens	158552	62.3272	NC_027282
Cedrela odorata	158558	62.1205	NC_037251
Populus adenopoda	158591	63.3031	NC_032368
Hansenia weberbaueriana	158625	62.3193	NC_035053
Punica granatum	158633	63.0777	NC_035240
Chloranthus japonicus	158640	61.1384	NC_026565
Adenocalymma divaricatum	158645	61.695	NC_037456
Chamaerops humilis	158653	62.8163	NC_029967
Cornus controversa	158674	62.2049	NC_030260
Morus notabilis	158680	63.6381	NC_027110
Decaisnea insignis	158683	61.5271	NC_035941
Asclepias syriaca	158719	62.1709	NC_022432
Sinojackia xylocarpa	158725	62.7519	NC_035418
Brahea brandegeei	158733	62.8042	NC_029968
Sinowilsonia henryi	158741	61.8265	NC_036069
Calanthe triplicata	158759	63.2626	NC_024544
Sinojackia rehderiana	158760	62.7557	NC_035711
Leitneria floridana	158763	62.3665	NC_030482
Eurycorymbus cavaleriei	158777	62.0839	NC_037443
Prunus serotina	158778	63.3721	NC_036133
Adenocalymma hatschbachii	158786	61.6881	NC_036499
Adenocalymma marginatum	158797	61.8897	NC_037457
Coreanomecon hylomeconoides	158824	61.2584	NC_031446
Nymphaea jamesoniana	158830	60.8197	NC_031826
Psidium guajava	158841	62.9881	NC_033355
Momordica charantia	158844	63.281	NC_036807
Baxteria australis	158858	62.8303	NC_029970
Barringtonia fusicarpa	158927	63.1428	NC_035701
Brasenia schreberi	158951	60.9546	NC_031343
Serenoa repens	158952	62.7321	NC_029953
Ulmus laciniata	158953	64.4341	NC_032719
Prunus padus	158955	63.4098	NC_026982
Zanthoxylum schinifolium	158963	61.6395	NC_030702
Pimenta dioica	158984	63.0334	NC_034684
Victoria cruziana	158993	60.9392	NC_035632
Bombax ceiba	158997	63.1911	NC_037494
Barringtonia racemosa	159002	63.1413	NC_035705
Lodoicea maldivica	159010	62.681	NC_029960
Adenocalymma cristicalyx	159010	61.993	NC_036498
Buxus microphylla	159010	61.932	NC_009599
Epipactis mairei	159019	62.7321	NC_030705
Gossypium stocksii	159039	62.5872	NC_023217
Gynostemma cardiospermum	159042	63.0777	NC_035959
Rheum wittrockii	159051	62.4441	NC_035950
Phytelephas aequatorialis	159075	62.7735	NC_029957
Ulmus pumila	159082	64.4272	NC_032721
Paphiopedilum niveum	159108	64.3091	NC_026776
Epimedium acuminatum	159112	61.1883	NC_029941
Ostrya trichocarpa	159122	63.5393	NC_034295
Eriobotrya japonica	159137	63.2782	NC_034639
Carpinus cordata	159157	63.526	NC_036723
Pyrus spinosa	159161	63.3861	NC_023130
Cercis glabra	159181	63.8393	NC_036762
Adenocalymma peregrinum	159187	61.674	NC_036501
Corynocarpus laevigatus	159202	63.4427	NC_014807
Gossypium incanum	159205	62.608	NC_018109
Gynostemma pentaphyllum	159208	63.1086	NC_029484
Daniellia pilosa	159243	63.9815	NC_036744
Morus cathayana	159265	63.8427	NC_031822
Pleione bulbocodioides	159269	62.7787	NC_036342
Fagopyrum tataricum Daegwan3-3	159272	62.1245	NC_027161
Parrotia subaequalis	159280	62.0191	NC_037243
Apostasia odorata	159285	64.2597	NC_030722
Hansenia forbesii	159287	62.3227	NC_035054
Guibourtia leonensis	159295	63.8513	NC_036742
Ostrya rehderiana	159347	63.5431	NC_028349
Dodonaea viscosa	159375	62.1396	NC_036099
Kostermanthus robustus	159381	63.6676	NC_030565
Adenanthera microsperma	159389	63.5276	NC_034986
Ludwigia octovalvis	159396	62.6327	NC_031385
Murraya koenigii	159402	61.4591	NC_032684
Adenocalymma aurantiacum	159407	61.7884	NC_036495
Gossypium bickii	159422	62.8031	NC_023214
Liriodendron chinense	159429	60.8434	NC_030504
Ulmus macrocarpa	159439	64.4372	NC_032720
Magnolia kobus	159443	60.727	NC_023237
Gossypium populifolium	159444	62.8039	NC_033398
Ulmus davidiana	159453	64.4528	NC_032718
Gossypium capitis-viridis	159467	62.6794	NC_018111
Ficus racemosa	159473	64.0616	NC_028185
Carapa guianensis	159483	62.0944	NC_037442
Pleonotoma albiflora	159488	61.9614	NC_037461
Hansenia forrestii	159505	62.3485	NC_035056
Gossypium anomalum	159507	62.6744	NC_023213
Curcuma roscoeana	159512	63.6654	NC_022928
Plinia trunciflora	159512	62.989	NC_034801
Eucalyptus obliqua	159527	63.0965	NC_022378
Clematis terniflora	159528	62.0035	NC_028000
Eucalyptus radiata	159529	63.0995	NC_022379
Gossypium somalense	159539	62.6348	NC_018110
Tamarindus indica	159551	63.7596	NC_026685
Firmiana pulcherrima	159556	62.872	NC_036395
Stockwellia quadrifida	159561	63.1489	NC_022414
Aquilaria sinensis	159565	62.8922	NC_029243
Gossypium areysianum	159572	62.6313	NC_018112
Eucalyptus umbra	159576	63.158	NC_022387
Gossypium australe	159578	62.8439	NC_033401
Morella rubra	159586	63.8502	NC_035006
Corylus heterophylla	159587	63.5215	NC_031856
Allosyncarpia ternata	159593	63.1782	NC_022413
Fagopyrum esculentum subsp. ancestrale	159599	62.0167	NC_010776
Entandrophragma cylindricum	159609	62.1801	NC_037250
Magnolia grandiflora	159623	60.6955	NC_020318
Gossypium sturtianum	159627	62.8666	NC_023218
Sorbus ulleungensis	159632	63.4597	NC_037022
Ananas comosus	159636	62.6269	NC_026220
Corylus avellana	159641	63.4705	NC_031855
Magnolia kwangsiensis	159667	60.7364	NC_015892
Macadamia ternifolia	159669	61.8912	NC_036416
Malus florentina	159672	63.4125	NC_035625
Carpinus putoensis	159673	63.5543	NC_033503
Juglans hopeiensis	159714	63.8573	NC_033894
Macadamia integrifolia	159714	61.8844	NC_025288
Wallichia densiflora	159717	63.0665	NC_029949
Epipactis veratrifolia	159719	62.6582	NC_030708
Eucalyptus delegatensis	159724	63.127	NC_022380
Adenocalymma bracteatum	159725	61.7455	NC_036497
Juglans mandshurica	159729	63.8613	NC_033892
Juglans cathayensis	159730	63.8603	NC_033893
Eustrephus latifolius	159736	61.9453	NC_025305
Eucalyptus erythrocorys	159742	63.1331	NC_022406
Arenga caudata	159744	63.0909	NC_029971
Adenocalymma acutissimum	159752	61.6343	NC_037455
Adenophora stricta	159759	61.4626	NC_036223
Khaya senegalensis	159787	62.0614	NC_037362
Aristolochia debilis	159793	61.7142	NC_036153
Caryota mitis	159819	62.8999	NC_029948
Malus micromalus	159834	63.3851	NC_036368
Glycosmis pentaphylla	159844	61.6132	NC_032687
Gossypium robinsonii	159849	62.8399	NC_018113
Corylus fargesii	159856	63.4934	NC_031854
Nymphaea ampla	159881	60.8033	NC_035680
Liriodendron tulipifera	159886	60.8427	NC_008326
Tetrastigma hemsleyanum	159889	62.4496	NC_029339
Citrus aurantiifolia	159893	61.5605	NC_024929
Eucalyptus elata	159899	63.1549	NC_022385
Lobelia malowensis	159907	61.1999	NC_036076
Piper auritum	159909	61.6882	NC_034697
Corylus chinensis	159915	63.5106	NC_032351
Pyrus pyrifolia	159922	63.4234	NC_015996
Megaleranthis saniculifolia	159924	61.9501	NC_012615
Gossypium turneri	159927	62.7386	NC_026835
Nymphaea alba	159930	60.8491	NC_006050
Trigonobalanus doichangensis	159938	63.0107	NC_023959
Magnolia cathcartii	159950	60.779	NC_023234
Eucalyptus diversifolia	159954	63.175	NC_022383
Gossypium gossypioides	159959	62.6879	NC_017894
Nymphaea mexicana	159962	60.9182	NC_024542
Merrillia caloxylon	159969	61.5369	NC_032688
Magnolia conifera	159973	60.7296	NC_037001
Eucalyptus sieberi	159985	63.1672	NC_022384
Althaea officinalis	159987	63.0014	NC_034701
Corymbia torelliana	159994	63.2161	NC_028410
Hydrastis canadensis	160000	61.4013	NC_034702
Magnolia biondii	160002	60.7617	NC_034687
Magnolia macrophylla var. dealbata	160002	60.7511	NC_023235
Corymbia eximia	160012	63.2153	NC_022409
[truncated: 490 more rows]

## Sheet: 4
Table S4. Codon usage in the plastid genomes of Santalales.
Data corresponding to completely heterotrophic Santalales are coloured orange, and data corresponding to mixotrophic Santalales are coloured green. Numbers denote the percentage of codons used to encode a specific amino acid compared with all codons of this amino acid. TAG codons of Balanophora reflexa are denoted as corresponding to tryptophan.
Amino acid	Codon	AT content of the codon	Rhopalocnemis phalloides	Balanophora reflexa	Champereia manillana	Osyris alba	Schoepfia jasminodora	Viscum album
Phe	TTT	2	97	100	65	63	66	69
	TTC	3	3	0	35	37	34	31
Leu	CTC	2	1	0	8	9	6	7
	TTG	1	3	0	25	22	21	23
	CTG	2	1	0	7	9	8	9
	CTT	2	5	3	20	20	23	19
	CTA	1	3	1	13	13	13	15
	TTA	3	87	96	28	27	30	28
Ile	ATA	2	42	58	32	32	33	39
	ATT	3	56	42	47	49	46	41
	ATC	3	2	0	21	20	21	20
Met	ATG	2	100	100	100	100	100	100
Val	GTA	1	50	61	34	35	32	31
	GTT	2	44	39	32	35	37	35
	GTC	2	0	0	17	14	17	16
	GTG	1	6	0	16	15	13	18
Ser	TCA	1	33	47	21	20	20	23
	AGC	1	0	0	5	5	5	5
	TCT	1	28	37	26	25	26	25
	TCG	2	11	0	10	10	12	8
	AGT	2	24	16	20	22	22	21
	TCC	2	3	0	19	18	15	18
Pro	CCA	0	54	32	30	30	29	34
	CCC	1	8	0	23	24	27	21
	CCT	0	33	68	31	33	32	33
	CCG	1	5	0	16	13	12	12
Thr	ACA	1	30	58	38	35	34	34
	ACT	2	47	42	36	36	34	37
	ACC	1	4	0	17	16	21	16
	ACG	2	18	0	10	13	11	13
Ala	GCC	0	6	0	18	18	21	18
	GCA	1	50	52	36	33	30	38
	GCT	0	44	48	34	34	37	34
	GCG	1	0	0	12	15	13	10
Tyr	TAT	3	97	98	80	79	80	82
	TAC	2	3	2	20	21	20	18
His	CAC	1	0	0	23	22	24	20
	CAT	2	100	100	77	78	76	80
Gln	CAA	2	96	97	81	80	82	80
	CAG	1	4	3	19	20	18	20
Asn	AAC	3	3	1	24	24	25	21
	AAT	2	97	99	76	76	75	79
Lys	AAG	2	3	1	26	24	26	21
	AAA	3	97	99	74	76	74	79
Asp	GAT	2	100	100	81	78	80	82
	GAC	1	0	0	19	22	20	18
Glu	GAG	1	1	2	29	27	32	29
	GAA	2	99	98	71	73	68	71
Cys	TGC	2	0	0	24	29	30	32
	TGT	1	100	100	76	71	70	68
Trp	TGG	1	100	0	100	100	100	100
	TAG	2	0	100	0	0	0	0
Arg	CGT	2	13	33	17	17	19	19
	CGA	0	23	3	22	21	20	22
	CGG	1	0	0	6	7	6	5
	AGA	0	58	64	38	37	37	38
	AGG	1	6	0	11	14	13	11
	CGC	1	0	0	4	5	5	5
Gly	GGT	1	36	45	26	28	27	27
	GGA	0	55	55	43	41	41	43
	GGG	0	3	0	20	20	23	22
	GGC	1	6	0	11	11	9	8
Stop codon	TAG	3	0	0	18	27	18	0
	TAA	2	91	91	73	64	64	73
	TGA	2	9	9	9	9	18	27

## Sheet: 5
Table S5. Amino acids usage in the proteins encoded in the plastid genomes of Santalales.
Data corresponding to completely heterotrophic Santalales are coloured orange, and data corresponding to mixotrophic Santalales are coloured green. Numbers are percentages, representing an amount of a specific amino acid compared with the total number of amino acids.
Amino acid	Average AT content of codons of this amino acid	Rhopalocnemis phalloides	Balanophora reflexa	Champereia manillana	Osyris alba	Schoepfia jasminodora	Viscum album
Ile	0.888889	17.5909	19.637	8.74894	8.35302	8.36606	9.10026
Phe	0.833333	8.68762	8.13366	5.73617	5.51806	5.94161	6.20394
Tyr	0.833333	9.08811	11.0773	3.93191	3.76308	3.8757	3.95887
Asn	0.833333	12.2612	13.7498	6.77447	6.56429	6.23186	5.9126
Lys	0.833333	15.0647	17.6229	8.15319	8.18427	8.74168	8.99743
Met	0.666667	1.32471	0.929561	2.26383	2.15997	2.18542	2.45073
Leu	0.611111	12.2304	9.64419	9.75319	9.80425	10.21	9.68295
Ser	0.5	4.43623	3.44712	8.22128	8.67364	8.31484	8.56898
Cys	0.5	0.770179	0.658439	1.19149	1.28248	1.07564	1.2168
His	0.5	0.985829	0.69717	2.41702	2.48059	2.3903	2.53642
Gln	0.5	2.74184	1.4718	4.17021	3.76308	3.80741	3.7018
Thr	0.5	2.74184	1.27815	4.74894	4.55619	5.01963	4.59297
Val	0.5	1.60197	1.08449	3.94894	4.04995	3.79034	3.80463
Asp	0.5	1.7252	1.12322	4.85106	5.04556	4.42206	4.71294
Glu	0.5	3.04991	2.13024	5.6	5.92305	5.56599	5.74122
Trp	0.333333	0.400493	0.539915	1.48085	1.51873	1.4854	1.42245
Arg	0.277778	1.47874	1.39434	6.55319	6.73304	6.64163	6.27249
Pro	0.166667	1.20148	1.4718	3.72766	3.79683	3.73912	3.71894
Ala	0.166667	0.492914	0.890829	2.89362	3.10496	3.12447	2.7078
Gly	0.166667	2.12569	3.02107	4.83404	4.72494	5.07086	4.6958

## Sheet: 6
Table S6. BLAST matches between genes and proteins of Rhopalocnemis phalloides and genes and proteins from NCBI NT and NCBI NR databases.
Gene	Description of BLASTN alignment results	Description of BLASTP alignment results
rrn16	The best two matches are to the plastid rrn16 genes from heterotrophic plants of Balanaphoraceae family, Corynaea crassa and Balanophora japonica respectively. The next several dozen matches are to rrn16 from plastid genomes of various SAR species.	-
rrn23	The best match is to the rrn23 of the heterotrophic plant Hydnora visseri from magnoliids (distant from Rhopalocnemis, which is in eudicots). The next several dozen matches are to rrn23 from plastid genomes of various SAR species. The match to Hydnora is also likely a result of convergence due to the high AT content.	-
accD	The best match is to the accD from the plastid genome of a heterotrophic plant Cynomorium coccineum from the order Saxifragales of eudicots. Probably a convergence due to the high AT content of both Cynomorium and Rhopalocnemis. Other best matches are mostly to plastid accD of various plants, mainly not closely related to Rhopalocnemis.	The best match is to the plastid AccD of Cressa cretica, a plant from eudicots, but from another order than Rhopalocnemis. Other matches from the top 100 best matches are to AccD of different plants, including some from Santalales.
clpP	The best match is to the clpP from the plastid genome of a heterotrophic plant Epipogium aphyllum from monocots. Probably a convergence due to the high AT content of both Epipogium and Rhopalocnemis. Other best matches are mostly to plastid clpP of various plants, mainly not closely related to Rhopalocnemis.	The best match is to the plastid ClpP of Phoradendron leucarpum from the order Santalales - the order Rhopalocnemis belongs to. The next two best matches are also to plastid ClpP of plants from Santalales and other matches in the top 100 are all to plants.
ycf1	The best match is to the nuclear genome of Plasmodium falciparum. All 100 best matches are to random regions from various taxons, including animals, bacteria, plants, protists and others.	The best match is to the plastid Ycf1 of Echinacea purpurea, a plant from eudicots, but from another order than Rhopalocnemis. Other matches from the list of the best matches are to Ycf1 of different plants, mainly distant from Rhopalocnemis
ycf2	The best match is to the nuclear genome of Plasmodium falciparum. All 100 best matches are to random regions from various taxons, including animals, bacteria, plants, protists and others.	The best match is to the plastid Ycf2 of Haloxylon ammodendron (saxaul), a plant from eudicots, but from another order than Rhopalocnemis. Other matches from the list of the best matches are to Ycf2 of different plants, mainly distant from Rhopalocnemis
rps3	The best match is to the nuclear genome of Plasmodium vivax. Most of the best matches are to random regions from various taxons, including animals, bacteria, plants, protists and others. Occasional matches to rps3 genes from various heterotrophic and autotrophic plants, not from Santalales, also exist.	The best match is to the Rps3 of Oxalis latifolia, from eudicots as Rhopalocnemis, but from another order Oxalidales. Other matches from the list of best matches are to Rps3 of different plants, mainly distant from Rhopalocnemis.
rps7	The best match is to the mitochondrial genome of a beetle Stomis pumicatus.	The best match is to the plastid Rps7 of Orchidantha fimbriata, from monocots, while the Rhopalocnemis is a eudicot. Other matches from the list of the best matches are to Rps7 of different plants, mainly distant from Rhopalocnemis
rps12	The best match is to a symbiotic bacterium of a beetle Euscepes postfasciatus. Most of the best matches are to random regions from various taxons, including animals, bacteria, plants, protists and others. Occasional matches to rps12 genes from various heterotrophic and autotrophic plants, not belonging to Santalales, also exist.	The best match is to the plastid Rps12 of a unicellular protist alga Cryptomonas curvata. Other matches are to plastid Rps12 from various protists and plants.
rps14	The best match is to the Homo sapiens nuclear genome. All 100 best matches are to random regions from various taxons, including animals, bacteria, plants, protists and others.	The best match is to the Rps14 of a cyanobacterium Pseudanabaena sp. PCC 6802. Other matches are to Rps14 from various plants and bacteria.
rps18	The best match is to the rps18 from the plastid genome of a heterotrophic plant Epipogium aphyllum from monocots. Probably a convergence due to the high AT content of both Epipogium and Rhopalocnemis. Other best matches are mostly to plastid rps18 of various plants, mainly not closely related to Rhopalocnemis.	The best match is to the plastid Rps18 of Echinacanthus lofouensis from eudicots, as Rhopalocnemis, but from another order Lamiales. All other matches from the top 100 are to different plants, but with no matches to Santalales.
rps19	The best match is to a bacterium Brachyspira intermedia. Most of the best matches are to random regions from various taxons, including animals, bacteria, plants, protists and others. Occasional matches to rps19 genes from various heterotrophic and autotrophic plants, not belonging to Santalales, also exist.	The best match is to the Rps19 from an alga Prasinoderma coloniale from Chlorophyta. Other matches from the list of best matches are to Rps19 from various bacteria and plants.
rpl2	The best match is to the mitochondrial genome of a choanoflagellate Monosiga brevicollis. All 100 best matches are to random regions from various taxons, including animals, bacteria, plants, protists and others.	The best match is to the Rpl2 from a heterotrophic plant Cynomorium songaricum, from the other order than Rhopalocnemis (Saxifragales), but also from eudicots. Other matches from the list of the best matches are to Rpl2 of different plants, mainly distant from Rhopalocnemis
rpl16	The best match is to the genome of a roundworm Strongyloides stercoralis. All 100 best matches are to random regions from various taxons, including animals, bacteria, plants, protists and others.	The best match is to the plastid Rpl16 from an alga Kumanoa americana from Rhodophyta. Other matches from the list of best matches are to Rpl16 of various plants and protists.
rpl36	no matches	The best match is to the Rpl36 of a bacterium "Candidatus Gribaldobacteria". Other matches from the list of best matches are to Rpl36 from various plants and bacteria.

## Sheet: 7
Table S7. Taxonomic distribution of best BLAST matches for 1000 random read pairs.
The read pairs with no matches likely correspond to huge non-coding regions of Rhopalocnemis phalloides nuclear genome.
By high-order taxons					By families
Taxon	Number of read pairs				Family	Number of read pairs
no significant matches	781				no significant matches	781
Embryophyta	146				Poaceae	35
bacteria	18				Solanaceae	21
fungi	2				Fabaceae	20
others	53				Malvaceae	12
					Cucurbitaceae	10
					Brassicaceae	9
					Cyprinidae	8
					Erwiniaceae	6
					Asteraceae	6
					Muridae	5
					Hominidae	5
					Vitaceae	5
					Schistosomatidae	4
					Euphorbiaceae	4
					Yersiniaceae	3
					Strongyloididae	3
					Convolvulaceae	3
					Moraxellaceae	2
					Balanophoraceae	2
					Araceae	2
					Cercopithecidae	2
					Plasmodiidae	2
					Gesneriaceae	2
					Formicidae	1
					Brachyspiraceae	1
					Amaryllidaceae	1
					Trichinellidae	1
					Lythraceae	1
					Burkholderiaceae	1
					Thermoactinomycetaceae	1
					Ancylostomatidae	1
					Dracunculidae	1
					Cleomaceae	1
					Orchidaceae	1
					Anisakidae	1
					Bovidae	1
					Cephalotaceae	1
					Salicaceae	1
					Dicrocoeliidae	1
					Asparagaceae	1
					Rhamnaceae	1
					Oleaceae	1
					Thelaziidae	1
					Chenopodiaceae	1
					Hydridae	1
					Pectinidae	1
					Drosophilidae	1
					Caryophyllaceae	1
					Onchocercidae	1
					Enterobacteriaceae	1
					Salmonidae	1
					Hymenolepididae	1
					Bufonidae	1
					Juglandaceae	1
					Adrianichthyidae	1
					Musaceae	1
					Hylobatidae	1
					Polystomatidae	1
					Onagraceae	1
					Rosaceae	1
					Papilionidae	1
					Rhizobiaceae	1
					Apterygidae	1
					Camelidae	1
					Staphylococcaceae	1
					Trichocomaceae	1
					Nymphalidae	1
					family in not defined for a species	4
